# Supplementary material for: Hetero-interpenetrated metal-organic frameworks
Source: Research Square preprint supplement (doi:10.21203/rs.3.rs-1342292/v1), 2022-02-17

## checkCIF/PLATON report

Structure factors have been supplied for datablock(s) muf-91-15h-58pc

THIS REPORT IS FOR GUIDANCE ONLY. IF USED AS PART OF A REVIEW PROCEDURE FOR PUBLICATION, IT SHOULD NOT REPLACE THE EXPERTISE OF AN EXPERIENCED CRYSTALLOGRAPHIC REFEREE.

No syntax errors found.      CIF dictionary      Interpreting this report

### Datablock: muf-91-15h-58pc

---

Bond precision:      = 0.0000 A

Wavelength=0.71075

Cell:                      a=17.150 (5)                      b=17.150 (5)                      c=17.150 (5)

                            alpha=90

                            beta=90

                            gamma=90

Temperature:              100 K

|                        | Calculated                      | Reported                                           |
|------------------------|---------------------------------|----------------------------------------------------|
| Volume                 | 5044 (4)                        | 5044 (5)                                           |
| Space group            | P -4 3 m                        | P -4 3 m                                           |
| Hall group             | P -4 2 3                        | P -4 2 3                                           |
| Moiety formula         | 2 (C9 H5.15 N0.50 O1.71 Zn0.53) | C84 H48 N6 O13 Zn4, C24.095 H13.768 O7.458 Zn2.295 |
| Sum formula            | C18.01 H10.30 N 03.41 Zn1.05    | C108.09 H61.77 N6 O20.46 Zn6.29                    |
| Mr                     | 363.99                          | 2183.02                                            |
| Dx, g cm <sup>-3</sup> | 0.719                           | 0.719                                              |
| Z                      | 6                               | 1                                                  |
| Mu (mm <sup>-1</sup> ) | 0.773                           | 0.772                                              |
| F000                   | 1105.1                          | 1105.0                                             |
| F000'                  | 1107.26                         |                                                    |
| h, k, lmax             | 17, 17, 17                      | 16, 17, 16                                         |
| Nref                   | 1059 [ 595]                     | 1050                                               |
| Tmin, Tmax             |                                 | 0.669, 0.746                                       |
| Tmin'                  |                                 |                                                    |

Correction method= # Reported T Limits: Tmin=0.669 Tmax=0.746

AbsCorr = MULTI-SCAN

Data completeness= 1.76/0.99

Theta(max)= 20.812

R(reflections)= 0.1364( 761)

wR2(reflections)=  
0.3639( 1050)

S = 1.517

Npar= 33

---

The following ALERTS were generated. Each ALERT has the format

**test-name\_ALERT\_alert-type\_alert-level.**

Click on the hyperlinks for more details of the test.

---

#### Alert level A

THETM01\_ALERT\_3\_A The value of sine(theta\_max)/wavelength is less than 0.550

Calculated sin(theta\_max)/wavelength = 0.4999

PLAT601\_ALERT\_2\_A Unit Cell Contains Solvent Accessible VOIDS of . 1642 Ang\*\*3

---

#### Alert level B

PLAT049\_ALERT\_1\_B Calculated Density Less Than 1.0 gcm-3 ..... 0.7190 Check

PLAT084\_ALERT\_3\_B High wR2 Value (i.e. > 0.25) ..... 0.36 Report

PLAT987\_ALERT\_1\_B The Flack x is >> 0 - Do a BASF/TWIN Refinement Please Check

---

#### Alert level C

STRVA01\_ALERT\_4\_C Flack test results are ambiguous.

From the CIF: \_refine\_ls\_abs\_structure\_Flack 0.360

From the CIF: \_refine\_ls\_abs\_structure\_Flack\_su 0.020

PLAT041\_ALERT\_1\_C Calc. and Reported SumFormula Strings Differ Please Check

PLAT053\_ALERT\_1\_C Minimum Crystal Dimension Missing (or Error) ... Please Check

PLAT054\_ALERT\_1\_C Medium Crystal Dimension Missing (or Error) ... Please Check

PLAT055\_ALERT\_1\_C Maximum Crystal Dimension Missing (or Error) ... Please Check

PLAT077\_ALERT\_4\_C Unitcell Contains Non-integer Number of Atoms .. Please Check

PLAT082\_ALERT\_2\_C High R1 Value ..... 0.14 Report

PLAT094\_ALERT\_2\_C Ratio of Maximum / Minimum Residual Density .... 2.38 Report

PLAT250\_ALERT\_2\_C Large U3/U1 Ratio for Average U(i,j) Tensor .... 2.5 Note

PLAT260\_ALERT\_2\_C Large Average Ueq of Residue Including Zn1 0.209 Check

PLAT905\_ALERT\_3\_C Negative K value in the Analysis of Variance ... -1.150 Report

PLAT911\_ALERT\_3\_C Missing FCF Refl Between Thmin & Sth/L= 0.500 4 Report

PLAT918\_ALERT\_3\_C Reflection(s) with I(obs) much Smaller I(calc) . 3 Check

PLAT927\_ALERT\_1\_C Reported and Calculated wR2 Differ by ..... -0.0015 Check

PLAT939\_ALERT\_3\_C Large Value of Not (SHELXL) Weight Optimized S . 19.50 Check

---

#### Alert level G

FORMU01\_ALERT\_2\_G There is a discrepancy between the atom counts in the

\_chemical\_formula\_sum and the formula from the \_atom\_site\* data.

Atom count from \_chemical\_formula\_sum: C108.09 H61.77 N6 O20.46 Zn6.29

Atom count from the \_atom\_site data: C79.96199 H54.88800 N6 O9.509600

ABSMU01\_ALERT\_1\_G Calculation of \_exptl\_absorpt\_correction\_mu

not performed for this radiation type.

CELLZ01\_ALERT\_1\_G Difference between formula and atom\_site contents detected.

CELLZ01\_ALERT\_1\_G ALERT: Large difference may be due to a

symmetry error - see SYMMG tests

From the CIF: \_cell\_formula\_units\_Z 1

From the CIF: \_chemical\_formula\_sum C108.09 H61.77 N6 O20.46 Zn6.29

TEST: Compare cell contents of formula and atom\_site data

| atom | Z*formula | cif sites | diff  |  |
|------|-----------|-----------|-------|--|
| C    | 108.09    | 79.96     | 28.13 |  |
| H    | 61.77     | 54.89     | 6.88  |  |
| N    | 6.00      | 6.00      | 0.00  |  |
| O    | 20.46     | 9.51      | 10.95 |  |
| Zn   | 6.29      | 1.05      | 5.24  |  |

  

|                   |                                                  |        |        |
|-------------------|--------------------------------------------------|--------|--------|
| PLAT002_ALERT_2_G | Number of Distance or Angle Restraints on AtSite | 10     | Note   |
| PLAT003_ALERT_2_G | Number of Uiso or Uij Restrained non-H Atoms ... | 18     | Report |
| PLAT042_ALERT_1_G | Calc. and Reported Moiety Formula Strings Differ | Please | Check  |
| PLAT045_ALERT_1_G | Calculated and Reported Z Differ by a Factor ... | 6.0000 | Check  |
| PLAT072_ALERT_2_G | SHELXL First Parameter in WGHT Unusually Large   | 0.20   | Report |
| PLAT171_ALERT_4_G | The CIF-Embedded .res File Contains EADP Records | 3      | Report |
| PLAT172_ALERT_4_G | The CIF-Embedded .res File Contains DFIX Records | 11     | Report |
| PLAT174_ALERT_4_G | The CIF-Embedded .res File Contains FLAT Records | 3      | Report |
| PLAT178_ALERT_4_G | The CIF-Embedded .res File Contains SIMU Records | 4      | Report |
| PLAT180_ALERT_4_G | Check Cell Rounding: # of Values Ending with 0 = | 3      | Note   |
| PLAT186_ALERT_4_G | The CIF-Embedded .res File Contains ISOR Records | 1      | Report |
| PLAT300_ALERT_4_G | Atom Site Occupancy of Zn0A Constrained at       | 0.1667 | Check  |
| PLAT300_ALERT_4_G | Atom Site Occupancy of O2 Constrained at         | 0.5    | Check  |
| PLAT300_ALERT_4_G | Atom Site Occupancy of O1 Constrained at         | 0.0417 | Check  |
| PLAT300_ALERT_4_G | Atom Site Occupancy of C12 Constrained at        | 0.5    | Check  |
| PLAT300_ALERT_4_G | Atom Site Occupancy of C13 Constrained at        | 0.5    | Check  |
| PLAT300_ALERT_4_G | Atom Site Occupancy of N1 Constrained at         | 0.25   | Check  |
| PLAT300_ALERT_4_G | Atom Site Occupancy of C10 Constrained at        | 0.25   | Check  |
| PLAT300_ALERT_4_G | Atom Site Occupancy of C11 Constrained at        | 0.25   | Check  |
| PLAT300_ALERT_4_G | Atom Site Occupancy of C14 Constrained at        | 0.25   | Check  |
| PLAT300_ALERT_4_G | Atom Site Occupancy of C15 Constrained at        | 0.25   | Check  |
| PLAT300_ALERT_4_G | Atom Site Occupancy of C16 Constrained at        | 0.25   | Check  |
| PLAT300_ALERT_4_G | Atom Site Occupancy of C17 Constrained at        | 0.25   | Check  |
| PLAT300_ALERT_4_G | Atom Site Occupancy of C18 Constrained at        | 0.25   | Check  |
| PLAT300_ALERT_4_G | Atom Site Occupancy of C19 Constrained at        | 0.25   | Check  |
| PLAT300_ALERT_4_G | Atom Site Occupancy of C20 Constrained at        | 0.25   | Check  |
| PLAT300_ALERT_4_G | Atom Site Occupancy of C21 Constrained at        | 0.25   | Check  |
| PLAT300_ALERT_4_G | Atom Site Occupancy of H12 Constrained at        | 0.5    | Check  |
| PLAT300_ALERT_4_G | Atom Site Occupancy of H13 Constrained at        | 0.25   | Check  |
| PLAT300_ALERT_4_G | Atom Site Occupancy of H17 Constrained at        | 0.25   | Check  |
| PLAT300_ALERT_4_G | Atom Site Occupancy of H18 Constrained at        | 0.25   | Check  |
| PLAT300_ALERT_4_G | Atom Site Occupancy of H19 Constrained at        | 0.25   | Check  |
| PLAT300_ALERT_4_G | Atom Site Occupancy of H20 Constrained at        | 0.25   | Check  |
| PLAT300_ALERT_4_G | Atom Site Occupancy of H21 Constrained at        | 0.25   | Check  |
| PLAT301_ALERT_3_G | Main Residue Disorder .....(Resd 1 )             | 100%   | Note   |
| PLAT304_ALERT_4_G | Non-Integer Number of Atoms in ..... (Resd 1 )   | 16.88  | Check  |
| PLAT315_ALERT_2_G | Singly Bonded Carbon Detected (H-atoms Missing). | C14    | Check  |
| PLAT315_ALERT_2_G | Singly Bonded Carbon Detected (H-atoms Missing). | C34    | Check  |
| PLAT432_ALERT_2_G | Short Inter X...Y Contact C13 ..C15 .            | 2.75   | Ang.   |
|                   | z,y,x =                                          | 24_555 | Check  |
| PLAT432_ALERT_2_G | Short Inter X...Y Contact N1 ..C15 .             | 2.40   | Ang.   |
|                   | z,y,x =                                          | 24_555 | Check  |
| PLAT432_ALERT_2_G | Short Inter X...Y Contact C14 ..C15 .            | 3.19   | Ang.   |
|                   | 1-x,y,1-z =                                      | 9_656  | Check  |
| PLAT432_ALERT_2_G | Short Inter X...Y Contact C14 ..C15 .            | 3.19   | Ang.   |
|                   | z,y,x =                                          | 24_555 | Check  |
| PLAT432_ALERT_2_G | Short Inter X...Y Contact C14 ..C15 .            | 3.19   | Ang.   |
|                   | 1-z,y,1-x =                                      | 23_656 | Check  |
| PLAT720_ALERT_4_G | Number of Unusual/Non-Standard Labels .....      | 1      | Note   |
| PLAT789_ALERT_4_G | Atoms with Negative _atom_site_disorder_group #  | 32     | Check  |

|                   |                                                   |    |             |
|-------------------|---------------------------------------------------|----|-------------|
| PLAT860_ALERT_3_G | Number of Least-Squares Restraints .....          | 87 | Note        |
| PLAT883_ALERT_1_G | No Info/Value for _atom_sites_solution_primary .  |    | Please Do ! |
| PLAT910_ALERT_3_G | Missing # of FCF Reflection(s) Below Theta (Min). | 4  | Note        |
| PLAT913_ALERT_3_G | Missing # of Very Strong Reflections in FCF ....  | 2  | Note        |
| PLAT933_ALERT_2_G | Number of HKL-OMIT Records in Embedded .res File  | 3  | Note        |
| PLAT955_ALERT_1_G | Reported (CIF) and Actual (FCF) Lmax Differ by .  | 1  | Units       |

---

|    |                      |                                                              |
|----|----------------------|--------------------------------------------------------------|
| 2  | <b>ALERT level A</b> | = Most likely a serious problem - resolve or explain         |
| 3  | <b>ALERT level B</b> | = A potentially serious problem, consider carefully          |
| 15 | <b>ALERT level C</b> | = Check. Ensure it is not caused by an omission or oversight |
| 55 | <b>ALERT level G</b> | = General information/check it is not something unexpected   |
|    |                      |                                                              |
| 14 | ALERT type 1         | CIF construction/syntax error, inconsistent or missing data  |
| 17 | ALERT type 2         | Indicator that the structure model may be wrong or deficient |
| 10 | ALERT type 3         | Indicator that the structure quality may be low              |
| 34 | ALERT type 4         | Improvement, methodology, query or suggestion                |
| 0  | ALERT type 5         | Informative message, check                                   |

---

It is advisable to attempt to resolve as many as possible of the alerts in all categories. Often the minor alerts point to easily fixed oversights, errors and omissions in your CIF or refinement strategy, so attention to these fine details can be worthwhile. In order to resolve some of the more serious problems it may be necessary to carry out additional measurements or structure refinements. However, the purpose of your study may justify the reported deviations and the more serious of these should normally be commented upon in the discussion or experimental section of a paper or in the "special\_details" fields of the CIF. checkCIF was carefully designed to identify outliers and unusual parameters, but every test has its limitations and alerts that are not important in a particular case may appear. Conversely, the absence of alerts does not guarantee there are no aspects of the results needing attention. It is up to the individual to critically assess their own results and, if necessary, seek expert advice.

### Publication of your CIF in IUCr journals

A basic structural check has been run on your CIF. These basic checks will be run on all CIFs submitted for publication in IUCr journals (*Acta Crystallographica*, *Journal of Applied Crystallography*, *Journal of Synchrotron Radiation*); however, if you intend to submit to *Acta Crystallographica Section C* or *E* or *IUCrData*, you should make sure that full publication checks are run on the final version of your CIF prior to submission.

### Publication of your CIF in other journals

Please refer to the *Notes for Authors* of the relevant journal for any special instructions relating to CIF submission.

### Validation response form

Please find below a validation response form (VRF) that can be filled in and pasted into your CIF.

```

# start Validation Reply Form
_vrf_THETM01_muf-91-15h-58pc
;
PROBLEM: The value of sine(theta_max)/wavelength is less than 0.550
RESPONSE: ...
;
_vrf_PLAT601_muf-91-15h-58pc
;
PROBLEM: Unit Cell Contains Solvent Accessible VOIDS of .      1642 Ang**3
RESPONSE: ...
;
# end Validation Reply Form

```

---

## PLATON version of 20/01/2022; check.def file version of 19/01/2022

Datablock muf-91-15h-58pc - ellipsoid plot

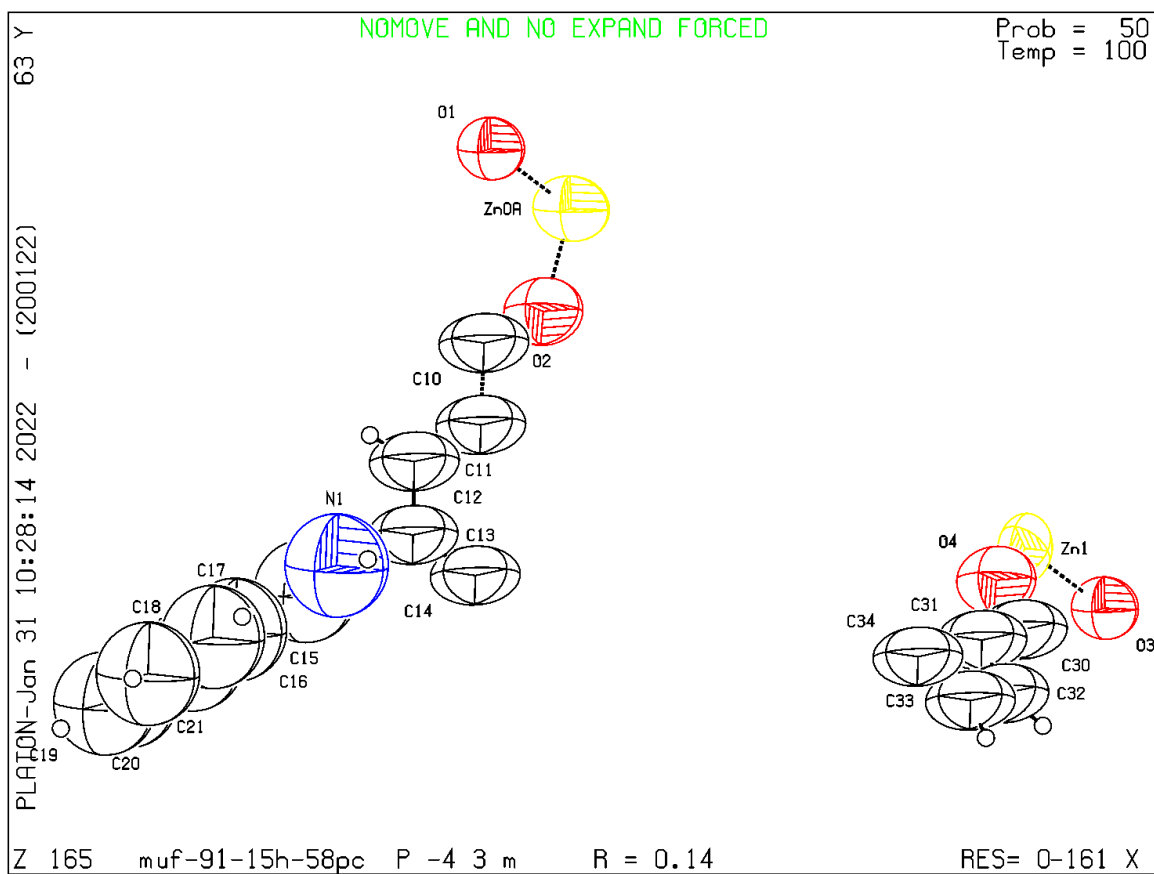

Supplement: Supplementary file 5 [file 4736ea9ff76581ba22fe176b.pdf]
