# Supplementary material for: Hetero-interpenetrated metal-organic frameworks
Source: Research Square preprint supplement (doi:10.21203/rs.3.rs-1342292/v1), 2022-02-17

## checkCIF/PLATON report

Structure factors have been supplied for datablock(s) muf-91-6h-52pc

THIS REPORT IS FOR GUIDANCE ONLY. IF USED AS PART OF A REVIEW PROCEDURE FOR PUBLICATION, IT SHOULD NOT REPLACE THE EXPERTISE OF AN EXPERIENCED CRYSTALLOGRAPHIC REFEREE.

No syntax errors found.      CIF dictionary      Interpreting this report

### Datablock: muf-91-6h-52pc

---

Bond precision:      = 0.0000 Å

Wavelength=0.95372

Cell:                      a=17.11(5)              b=17.11(5)              c=17.11(5)  
                                alpha=90              beta=90              gamma=90

Temperature:              100 K

|                        | Calculated                         | Reported                                              |
|------------------------|------------------------------------|-------------------------------------------------------|
| Volume                 | 5009(44)                           | 5008(46)                                              |
| Space group            | P -4 3 m                           | P -4 3 m                                              |
| Hall group             | P -4 2 3                           | P -4 2 3                                              |
| Moiety formula         | C13.22 H7.55 N0.75 O2.47<br>Zn0.76 | C84 H48 N6 O13 Zn4, C21.785<br>H12.449 O6.743 Zn2.075 |
| Sum formula            | C13.22 H7.55 N0.75 O2.47<br>Zn0.76 | C105.78 H60.45 N6 O19.74<br>Zn6.07                    |
| Mr                     | 265.98                             | 2128.04                                               |
| Dx, g cm <sup>-3</sup> | 0.705                              | 0.706                                                 |
| Z                      | 8                                  | 1                                                     |
| Mu (mm <sup>-1</sup> ) | 1.642                              | 1.623                                                 |
| F000                   | 1077.0                             | 1077.0                                                |
| F000'                  | 1077.16                            |                                                       |
| h, k, lmax             | 12, 12, 12                         | 12, 12, 12                                            |
| Nref                   | 410[ 240]                          | 403                                                   |
| Tmin, Tmax             |                                    | 0.546, 0.746                                          |
| Tmin'                  |                                    |                                                       |

Correction method= # Reported T Limits: Tmin=0.546 Tmax=0.746

AbsCorr = MULTII-SCAN

Data completeness= 1.68/0.98

Theta(max)= 19.890

R(reflections)= 0.1948( 317)

wR2(reflections)=  
0.4460( 403)

S = 2.033

Npar= 33

---

The following ALERTS were generated. Each ALERT has the format

**test-name\_ALERT\_alert-type\_alert-level.**

Click on the hyperlinks for more details of the test.

---

#### Alert level A

THETM01\_ALERT\_3\_A The value of sine(theta\_max)/wavelength is less than 0.550

Calculated sin(theta\_max)/wavelength = 0.3567

PLAT601\_ALERT\_2\_A Unit Cell Contains Solvent Accessible VOIDS of . 1612 Ang\*\*3

---

#### Alert level B

|                   |                                              |        |        |
|-------------------|----------------------------------------------|--------|--------|
| PLAT049_ALERT_1_B | Calculated Density Less Than 1.0 gcm-3 ..... | 0.7050 | Check  |
| PLAT082_ALERT_2_B | High R1 Value .....                          | 0.19   | Report |
| PLAT084_ALERT_3_B | High wR2 Value (i.e. > 0.25) .....           | 0.45   | Report |
| PLAT260_ALERT_2_B | Large Average Ueq of Residue Including Zn1   | 0.337  | Check  |

---

#### Alert level C

GOODF01\_ALERT\_2\_C The least squares goodness of fit parameter lies  
outside the range 0.80 <> 2.00

Goodness of fit given = 2.033

STRVA01\_ALERT\_4\_C Flack test results are ambiguous.

From the CIF: \_refine\_ls\_abs\_structure\_Flack 0.340

From the CIF: \_refine\_ls\_abs\_structure\_Flack\_su 0.020

|                   |                                                  |       |              |
|-------------------|--------------------------------------------------|-------|--------------|
| PLAT029_ALERT_3_C | _diffrn_measured_fraction_theta_full value Low . | 0.979 | Why?         |
| PLAT041_ALERT_1_C | Calc. and Reported SumFormula Strings Differ     |       | Please Check |
| PLAT053_ALERT_1_C | Minimum Crystal Dimension Missing (or Error) ... |       | Please Check |
| PLAT054_ALERT_1_C | Medium Crystal Dimension Missing (or Error) ...  |       | Please Check |
| PLAT055_ALERT_1_C | Maximum Crystal Dimension Missing (or Error) ... |       | Please Check |
| PLAT077_ALERT_4_C | Unitcell Contains Non-integer Number of Atoms .. |       | Please Check |
| PLAT087_ALERT_2_C | Unsatisfactory S value (Too High) .....          | 2.03  | Check        |
| PLAT090_ALERT_3_C | Poor Data / Parameter Ratio (Zmax > 18) .....    | 7.12  | Note         |
| PLAT148_ALERT_3_C | s.u. on the a - Axis is (Too) Large ....         | 0.050 | Ang.         |
| PLAT250_ALERT_2_C | Large U3/U1 Ratio for Average U(i,j) Tensor .... | 2.9   | Note         |
| PLAT918_ALERT_3_C | Reflection(s) with I(obs) much Smaller I(calc) . | 3     | Check        |
| PLAT939_ALERT_3_C | Large Value of Not (SHELXL) Weight Optimized S . | 31.63 | Check        |

---

#### Alert level G

FORMU01\_ALERT\_2\_G There is a discrepancy between the atom counts in the  
\_chemical\_formula\_sum and the formula from the \_atom\_site\* data.

Atom count from \_chemical\_formula\_sum: C105.7799 H60.45 N6 O19.74 Zn6.0

Atom count from the \_atom\_site data: C79.056 H54.21599 N6 O9.171299 Z

ABSMU01\_ALERT\_1\_G Calculation of \_exptl\_absorpt\_correction\_mu  
not performed for this radiation type.

CELLZ01\_ALERT\_1\_G Difference between formula and atom\_site contents detected.

CELLZ01\_ALERT\_1\_G ALERT: Large difference may be due to a  
symmetry error - see SYMMG tests

From the CIF: \_cell\_formula\_units\_Z 1

From the CIF: \_chemical\_formula\_sum C105.78 H60.45 N6 O19.74 Zn6.07  
 TEST: Compare cell contents of formula and atom\_site data

| atom | Z*formula | cif sites | diff  |  |
|------|-----------|-----------|-------|--|
| C    | 105.78    | 79.06     | 26.72 |  |
| H    | 60.45     | 54.22     | 6.23  |  |
| N    | 6.00      | 6.00      | 0.00  |  |
| O    | 19.74     | 9.17      | 10.57 |  |
| Zn   | 6.07      | 1.01      | 5.06  |  |

  

|                   |                                                  |         |              |
|-------------------|--------------------------------------------------|---------|--------------|
| PLAT002_ALERT_2_G | Number of Distance or Angle Restraints on AtSite | 10      | Note         |
| PLAT003_ALERT_2_G | Number of Uiso or Uij Restrained non-H Atoms ... | 18      | Report       |
| PLAT007_ALERT_5_G | Number of Unrefined Donor-H Atoms .....          | 1       | Report       |
| PLAT042_ALERT_1_G | Calc. and Reported Moiety Formula Strings Differ |         | Please Check |
| PLAT045_ALERT_1_G | Calculated and Reported Z Differ by a Factor ... | 8.0000  | Check        |
| PLAT072_ALERT_2_G | SHELXL First Parameter in WGHT Unusually Large   | 0.20    | Report       |
| PLAT092_ALERT_4_G | Check: Wavelength Given is not Cu,Ga,Mo,Ag,In Ka | 0.95372 | Ang.         |
| PLAT152_ALERT_1_G | The Supplied and Calc. Volume s.u. Differ by ... | -2      | Units        |
| PLAT171_ALERT_4_G | The CIF-Embedded .res File Contains EADP Records | 3       | Report       |
| PLAT172_ALERT_4_G | The CIF-Embedded .res File Contains DFIX Records | 11      | Report       |
| PLAT174_ALERT_4_G | The CIF-Embedded .res File Contains FLAT Records | 3       | Report       |
| PLAT178_ALERT_4_G | The CIF-Embedded .res File Contains SIMU Records | 2       | Report       |
| PLAT186_ALERT_4_G | The CIF-Embedded .res File Contains ISOR Records | 1       | Report       |
| PLAT300_ALERT_4_G | Atom Site Occupancy of Zn0A Constrained at       | 0.1667  | Check        |
| PLAT300_ALERT_4_G | Atom Site Occupancy of O2 Constrained at         | 0.5     | Check        |
| PLAT300_ALERT_4_G | Atom Site Occupancy of O1 Constrained at         | 0.0417  | Check        |
| PLAT300_ALERT_4_G | Atom Site Occupancy of C12 Constrained at        | 0.5     | Check        |
| PLAT300_ALERT_4_G | Atom Site Occupancy of C13 Constrained at        | 0.5     | Check        |
| PLAT300_ALERT_4_G | Atom Site Occupancy of N1 Constrained at         | 0.25    | Check        |
| PLAT300_ALERT_4_G | Atom Site Occupancy of C10 Constrained at        | 0.25    | Check        |
| PLAT300_ALERT_4_G | Atom Site Occupancy of C11 Constrained at        | 0.25    | Check        |
| PLAT300_ALERT_4_G | Atom Site Occupancy of C14 Constrained at        | 0.25    | Check        |
| PLAT300_ALERT_4_G | Atom Site Occupancy of C15 Constrained at        | 0.25    | Check        |
| PLAT300_ALERT_4_G | Atom Site Occupancy of C16 Constrained at        | 0.25    | Check        |
| PLAT300_ALERT_4_G | Atom Site Occupancy of C17 Constrained at        | 0.25    | Check        |
| PLAT300_ALERT_4_G | Atom Site Occupancy of C18 Constrained at        | 0.25    | Check        |
| PLAT300_ALERT_4_G | Atom Site Occupancy of C19 Constrained at        | 0.25    | Check        |
| PLAT300_ALERT_4_G | Atom Site Occupancy of C20 Constrained at        | 0.25    | Check        |
| PLAT300_ALERT_4_G | Atom Site Occupancy of C21 Constrained at        | 0.25    | Check        |
| PLAT300_ALERT_4_G | Atom Site Occupancy of H12 Constrained at        | 0.5     | Check        |
| PLAT300_ALERT_4_G | Atom Site Occupancy of H13 Constrained at        | 0.25    | Check        |
| PLAT300_ALERT_4_G | Atom Site Occupancy of H17 Constrained at        | 0.25    | Check        |
| PLAT300_ALERT_4_G | Atom Site Occupancy of H18 Constrained at        | 0.25    | Check        |
| PLAT300_ALERT_4_G | Atom Site Occupancy of H19 Constrained at        | 0.25    | Check        |
| PLAT300_ALERT_4_G | Atom Site Occupancy of H20 Constrained at        | 0.25    | Check        |
| PLAT300_ALERT_4_G | Atom Site Occupancy of H21 Constrained at        | 0.25    | Check        |
| PLAT301_ALERT_3_G | Main Residue Disorder .....(Resd 1 )             | 100%    | Note         |
| PLAT304_ALERT_4_G | Non-Integer Number of Atoms in ..... (Resd 1 )   | 24.75   | Check        |
| PLAT315_ALERT_2_G | Singly Bonded Carbon Detected (H-atoms Missing). | C14     | Check        |
| PLAT315_ALERT_2_G | Singly Bonded Carbon Detected (H-atoms Missing). | C34     | Check        |
| PLAT432_ALERT_2_G | Short Inter X...Y Contact C14 ..C15 .            | 3.18    | Ang.         |
|                   | 1-x,y,1-z =                                      | 9_656   | Check        |
| PLAT432_ALERT_2_G | Short Inter X...Y Contact C14 ..C15 .            | 3.18    | Ang.         |
|                   | 1-z,y,1-x =                                      | 23_656  | Check        |
| PLAT720_ALERT_4_G | Number of Unusual/Non-Standard Labels .....      | 1       | Note         |
| PLAT789_ALERT_4_G | Atoms with Negative _atom_site_disorder_group #  | 31      | Check        |
| PLAT860_ALERT_3_G | Number of Least-Squares Restraints .....         | 75      | Note         |
| PLAT883_ALERT_1_G | No Info/Value for _atom_sites_solution_primary . |         | Please Do !  |

|                   |                                                  |         |       |
|-------------------|--------------------------------------------------|---------|-------|
| PLAT909_ALERT_3_G | Percentage of I>2sig(I) Data at Theta(Max) Still | 52%     | Note  |
| PLAT910_ALERT_3_G | Missing # of FCF Reflection(s) Below Theta(Min). | 4       | Note  |
| PLAT913_ALERT_3_G | Missing # of Very Strong Reflections in FCF .... | 3       | Note  |
| PLAT933_ALERT_2_G | Number of HKL-OMIT Records in Embedded .res File | 1       | Note  |
| PLAT984_ALERT_1_G | The O-f' = 0.0218 Deviates from the B&C-Value    | 0.0205  | Check |
| PLAT984_ALERT_1_G | The Zn-f' = -0.1382 Deviates from the B&C-Value  | -0.1517 | Check |
| PLAT985_ALERT_1_G | The Zn-f" = 2.4327 Deviates from the B&C-Value   | 2.3734  | Check |

---

2 **ALERT level A** = Most likely a serious problem - resolve or explain  
 4 **ALERT level B** = A potentially serious problem, consider carefully  
 14 **ALERT level C** = Check. Ensure it is not caused by an omission or oversight  
 57 **ALERT level G** = General information/check it is not something unexpected

15 ALERT type 1 CIF construction/syntax error, inconsistent or missing data  
 15 ALERT type 2 Indicator that the structure model may be wrong or deficient  
 12 ALERT type 3 Indicator that the structure quality may be low  
 34 ALERT type 4 Improvement, methodology, query or suggestion  
 1 ALERT type 5 Informative message, check

---

It is advisable to attempt to resolve as many as possible of the alerts in all categories. Often the minor alerts point to easily fixed oversights, errors and omissions in your CIF or refinement strategy, so attention to these fine details can be worthwhile. In order to resolve some of the more serious problems it may be necessary to carry out additional measurements or structure refinements. However, the purpose of your study may justify the reported deviations and the more serious of these should normally be commented upon in the discussion or experimental section of a paper or in the "special\_details" fields of the CIF. checkCIF was carefully designed to identify outliers and unusual parameters, but every test has its limitations and alerts that are not important in a particular case may appear. Conversely, the absence of alerts does not guarantee there are no aspects of the results needing attention. It is up to the individual to critically assess their own results and, if necessary, seek expert advice.

### Publication of your CIF in IUCr journals

A basic structural check has been run on your CIF. These basic checks will be run on all CIFs submitted for publication in IUCr journals (*Acta Crystallographica*, *Journal of Applied Crystallography*, *Journal of Synchrotron Radiation*); however, if you intend to submit to *Acta Crystallographica Section C* or *E* or *IUCrData*, you should make sure that full publication checks are run on the final version of your CIF prior to submission.

### Publication of your CIF in other journals

Please refer to the *Notes for Authors* of the relevant journal for any special instructions relating to CIF submission.

### Validation response form

Please find below a validation response form (VRF) that can be filled in and pasted into your CIF.

```

# start Validation Reply Form
_vrf_THETM01_muf-91-6h-52pc
;
PROBLEM: The value of sine(theta_max)/wavelength is less than 0.550
RESPONSE: ...
;
_vrf_PLAT601_muf-91-6h-52pc
;
PROBLEM: Unit Cell Contains Solvent Accessible VOIDS of .          1612 Ang**3
RESPONSE: ...
;
# end Validation Reply Form

```

---

**PLATON version of 20/01/2022; check.def file version of 19/01/2022**

Datablock muf-91-6h-52pc - ellipsoid plot

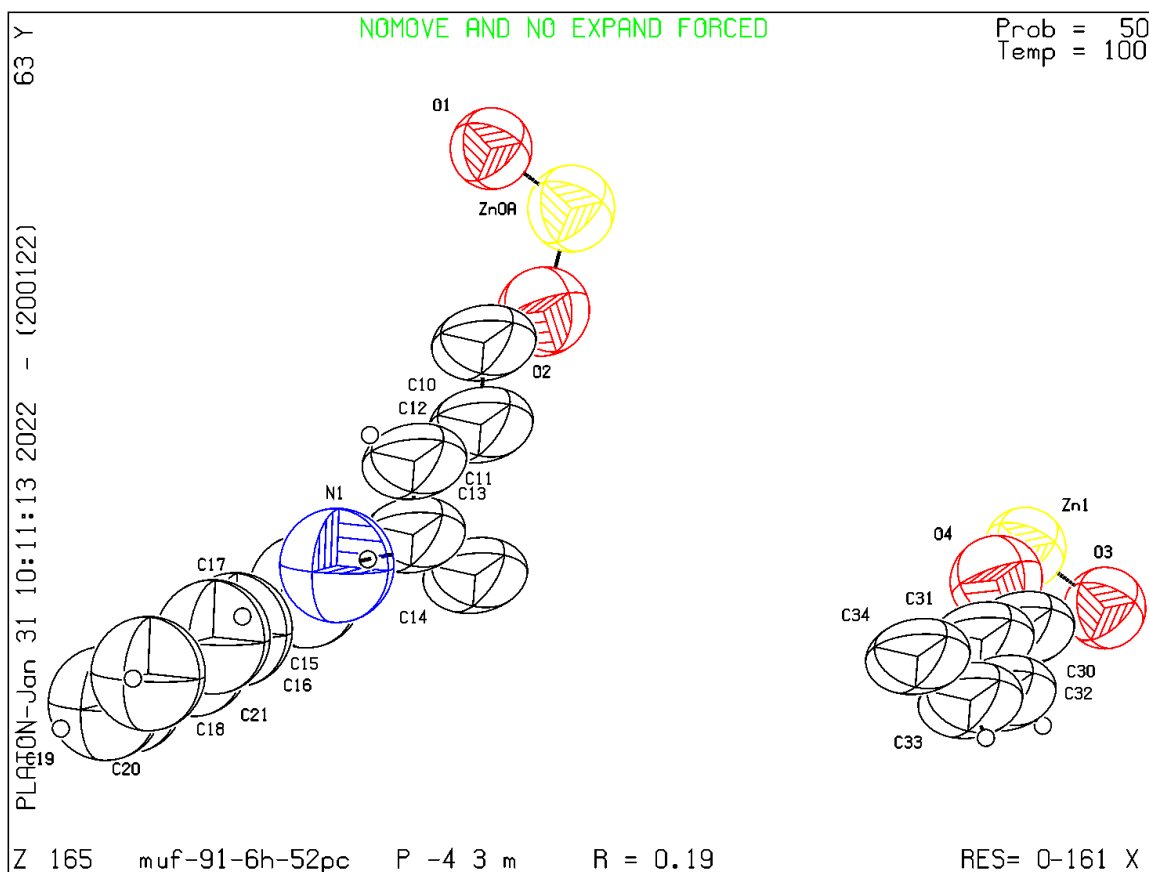

Supplement: Supplementary file 1 [file 171202f0b734e456ca418f44.pdf]
