# Supplementary material for: Hetero-interpenetrated metal-organic frameworks
Source: Research Square preprint supplement (doi:10.21203/rs.3.rs-1342292/v1), 2022-02-17

## checkCIF/PLATON report

Structure factors have been supplied for datablock(s) muf-92-3h-42pc

THIS REPORT IS FOR GUIDANCE ONLY. IF USED AS PART OF A REVIEW PROCEDURE FOR PUBLICATION, IT SHOULD NOT REPLACE THE EXPERTISE OF AN EXPERIENCED CRYSTALLOGRAPHIC REFEREE.

No syntax errors found.      CIF dictionary      Interpreting this report

### Datablock: muf-92-3h-42pc

---

Bond precision:      O- C = 0.0005 Å      Wavelength=0.71075

Cell:                      a=17.146(7)                      b=17.146(7)                      c=17.146(7)  
                                    alpha=90                      beta=90                      gamma=90

Temperature:              100 K

|                        | Calculated                                                        | Reported                                                       |
|------------------------|-------------------------------------------------------------------|----------------------------------------------------------------|
| Volume                 | 5041(6)                                                           | 5041(6)                                                        |
| Space group            | P -4 3 m                                                          | P -4 3 m                                                       |
| Hall group             | P -4 2 3                                                          | P -4 2 3                                                       |
| Moiety formula         | C7 H4 N0.50 O1.08 Zn0.33,<br>2(C0.74 H0.47 N0.05 O0.23<br>Zn0.07) | C84 H48 N6 O13 Zn4, C17.56<br>H11.284 N1.254 O5.435<br>Zn1.672 |
| Sum formula            | C8.47 H4.94 N0.60 O1.54<br>Zn0.47                                 | C101.56 H59.28 N7.25 O18.44<br>Zn5.67                          |
| Mr                     | 170.74                                                            | 2046.75                                                        |
| Dx, g cm <sup>-3</sup> | 0.675                                                             | 0.674                                                          |
| Z                      | 12                                                                | 1                                                              |
| Mu (mm <sup>-1</sup> ) | 0.699                                                             | 0.698                                                          |
| F000                   | 1038.0                                                            | 1037.0                                                         |
| F000'                  | 1040.01                                                           |                                                                |
| h, k, lmax             | 13, 13, 13                                                        | 13, 13, 13                                                     |
| Nref                   | 563[ 324]                                                         | 558                                                            |
| Tmin, Tmax             |                                                                   | 0.577, 0.746                                                   |
| Tmin'                  |                                                                   |                                                                |

Correction method= # Reported T Limits: Tmin=0.577 Tmax=0.746  
AbsCorr = MULTII-SCAN

Data completeness= 1.72/0.99

Theta(max)= 16.465

R(reflections)= 0.1840( 433)

wR2(reflections)=  
0.4146( 558)

S = 1.745

Npar= 66

---

The following ALERTS were generated. Each ALERT has the format

**test-name\_ALERT\_alert-type\_alert-level.**

Click on the hyperlinks for more details of the test.

---

### Alert level A

THETM01\_ALERT\_3\_A The value of sine(theta\_max)/wavelength is less than 0.550

Calculated sin(theta\_max)/wavelength = 0.3988

PLAT601\_ALERT\_2\_A Unit Cell Contains Solvent Accessible VOIDS of . 1549 Ang\*\*3

---

### Alert level B

|                   |                                                 |        |              |
|-------------------|-------------------------------------------------|--------|--------------|
| PLAT049_ALERT_1_B | Calculated Density Less Than 1.0 gcm-3 .....    | 0.6749 | Check        |
| PLAT082_ALERT_2_B | High R1 Value .....                             | 0.18   | Report       |
| PLAT084_ALERT_3_B | High wR2 Value (i.e. > 0.25) .....              | 0.41   | Report       |
| PLAT090_ALERT_3_B | Poor Data / Parameter Ratio (Zmax > 18) .....   | 4.85   | Note         |
| PLAT987_ALERT_1_B | The Flack x is >> 0 - Do a BASF/TWIN Refinement |        | Please Check |

---

### Alert level C

STRVA01\_ALERT\_4\_C Flack test results are ambiguous.

From the CIF: \_refine\_ls\_abs\_structure\_Flack 0.550

From the CIF: \_refine\_ls\_abs\_structure\_Flack\_su 0.060

|                   |                                                  |       |              |
|-------------------|--------------------------------------------------|-------|--------------|
| PLAT041_ALERT_1_C | Calc. and Reported SumFormula Strings Differ     |       | Please Check |
| PLAT053_ALERT_1_C | Minimum Crystal Dimension Missing (or Error) ... |       | Please Check |
| PLAT054_ALERT_1_C | Medium Crystal Dimension Missing (or Error) ...  |       | Please Check |
| PLAT055_ALERT_1_C | Maximum Crystal Dimension Missing (or Error) ... |       | Please Check |
| PLAT068_ALERT_1_C | Reported F000 Differs from Calcd (or Missing)... |       | Please Check |
| PLAT077_ALERT_4_C | Unitcell Contains Non-integer Number of Atoms .. |       | Please Check |
| PLAT241_ALERT_2_C | High 'MainMol' Ueq as Compared to Neighbors of   | C4A   | Check        |
| PLAT242_ALERT_2_C | Low 'MainMol' Ueq as Compared to Neighbors of    | O3A   | Check        |
| PLAT245_ALERT_2_C | U(iso) H7A Smaller than U(eq) N9A by             | 0.049 | Ang**2       |
| PLAT250_ALERT_2_C | Large U3/U1 Ratio for Average U(i,j) Tensor .... | 2.5   | Note         |
| PLAT260_ALERT_2_C | Large Average Ueq of Residue Including Zn2A      | 0.283 | Check        |
| PLAT260_ALERT_2_C | Large Average Ueq of Residue Including Zn2B      | 0.227 | Check        |
| PLAT329_ALERT_4_C | Carbon Atom Hybridisation Unclear for .....      | C7A   | Check        |
| PLAT907_ALERT_2_C | Flack x > 0.5, Structure Needs to be Inverted? . | 0.55  | Check        |
| PLAT918_ALERT_3_C | Reflection(s) with I(obs) much Smaller I(calc) . | 2     | Check        |
| PLAT939_ALERT_3_C | Large Value of Not (SHELXL) Weight Optimized S . | 10.91 | Check        |

---

### Alert level G

FORMU01\_ALERT\_2\_G There is a discrepancy between the atom counts in the

\_chemical\_formula\_sum and the formula from the \_atom\_site\* data.

Atom count from \_chemical\_formula\_sum: C101.56 H59.28 N7.25 O18.44 Zn5.

Atom count from the \_atom\_site data: C92.64 H57.86399 N6.624 O18.46 Z

CELLZ01\_ALERT\_1\_G Difference between formula and atom\_site contents detected.

CELLZ01\_ALERT\_1\_G ALERT: Large difference may be due to a

symmetry error - see SYMMG tests

From the CIF: \_cell\_formula\_units\_Z 1

From the CIF: \_chemical\_formula\_sum C101.56 H59.28 N7.25 O18.44 Zn5.67  
 TEST: Compare cell contents of formula and atom\_site data

| atom              | Z*formula                                        | cif sites      | diff    |              |
|-------------------|--------------------------------------------------|----------------|---------|--------------|
| C                 | 101.56                                           | 92.64          | 8.92    |              |
| H                 | 59.28                                            | 57.86          | 1.42    |              |
| N                 | 7.25                                             | 6.62           | 0.63    |              |
| O                 | 18.44                                            | 18.46          | -0.02   |              |
| Zn                | 5.67                                             | 2.35           | 3.32    |              |
| PLAT002_ALERT_2_G | Number of Distance or Angle Restraints on AtSite |                |         | 14 Note      |
| PLAT003_ALERT_2_G | Number of Uiso or Uij Restrained non-H Atoms ... |                |         | 25 Report    |
| PLAT004_ALERT_5_G | Polymeric Structure Found with Maximum Dimension |                |         | 3 Info       |
| PLAT007_ALERT_5_G | Number of Unrefined Donor-H Atoms .....          |                |         | 4 Report     |
| PLAT042_ALERT_1_G | Calc. and Reported Moiety Formula Strings Differ |                |         | Please Check |
| PLAT045_ALERT_1_G | Calculated and Reported Z Differ by a Factor ... |                | 12.0000 | Check        |
| PLAT072_ALERT_2_G | SHELXL First Parameter in WGHT Unusually Large   |                | 0.20    | Report       |
| PLAT171_ALERT_4_G | The CIF-Embedded .res File Contains EADP Records |                | 2       | Report       |
| PLAT172_ALERT_4_G | The CIF-Embedded .res File Contains DFIX Records |                | 12      | Report       |
| PLAT174_ALERT_4_G | The CIF-Embedded .res File Contains FLAT Records |                | 3       | Report       |
| PLAT176_ALERT_4_G | The CIF-Embedded .res File Contains SADI Records |                | 1       | Report       |
| PLAT178_ALERT_4_G | The CIF-Embedded .res File Contains SIMU Records |                | 5       | Report       |
| PLAT186_ALERT_4_G | The CIF-Embedded .res File Contains ISOR Records |                | 2       | Report       |
| PLAT300_ALERT_4_G | Atom Site Occupancy of Zn2A                      | Constrained at | 0.1667  | Check        |
| PLAT300_ALERT_4_G | Atom Site Occupancy of C6A                       | Constrained at | 0.5     | Check        |
| PLAT300_ALERT_4_G | Atom Site Occupancy of C7A                       | Constrained at | 0.5     | Check        |
| PLAT300_ALERT_4_G | Atom Site Occupancy of N9A                       | Constrained at | 0.25    | Check        |
| PLAT300_ALERT_4_G | Atom Site Occupancy of C5A                       | Constrained at | 0.25    | Check        |
| PLAT300_ALERT_4_G | Atom Site Occupancy of C8A                       | Constrained at | 0.25    | Check        |
| PLAT300_ALERT_4_G | Atom Site Occupancy of C11A                      | Constrained at | 0.25    | Check        |
| PLAT300_ALERT_4_G | Atom Site Occupancy of C12A                      | Constrained at | 0.25    | Check        |
| PLAT300_ALERT_4_G | Atom Site Occupancy of C13A                      | Constrained at | 0.25    | Check        |
| PLAT300_ALERT_4_G | Atom Site Occupancy of C14A                      | Constrained at | 0.25    | Check        |
| PLAT300_ALERT_4_G | Atom Site Occupancy of C15A                      | Constrained at | 0.25    | Check        |
| PLAT300_ALERT_4_G | Atom Site Occupancy of C16A                      | Constrained at | 0.25    | Check        |
| PLAT300_ALERT_4_G | Atom Site Occupancy of C17A                      | Constrained at | 0.25    | Check        |
| PLAT300_ALERT_4_G | Atom Site Occupancy of H6A                       | Constrained at | 0.5     | Check        |
| PLAT300_ALERT_4_G | Atom Site Occupancy of H7A                       | Constrained at | 0.25    | Check        |
| PLAT300_ALERT_4_G | Atom Site Occupancy of H13A                      | Constrained at | 0.25    | Check        |
| PLAT300_ALERT_4_G | Atom Site Occupancy of H14A                      | Constrained at | 0.25    | Check        |
| PLAT300_ALERT_4_G | Atom Site Occupancy of H15A                      | Constrained at | 0.25    | Check        |
| PLAT300_ALERT_4_G | Atom Site Occupancy of H16A                      | Constrained at | 0.25    | Check        |
| PLAT300_ALERT_4_G | Atom Site Occupancy of H17A                      | Constrained at | 0.25    | Check        |
| PLAT301_ALERT_3_G | Main Residue Disorder .....(Resd 1 )             |                | 81%     | Note         |
| PLAT302_ALERT_4_G | Anion/Solvent/Minor-Residue Disorder (Resd 2 )   |                | 100%    | Note         |
| PLAT315_ALERT_2_G | Singly Bonded Carbon Detected (H-atoms Missing). |                | C8A     | Check        |
| PLAT720_ALERT_4_G | Number of Unusual/Non-Standard Labels .....      |                | 3       | Note         |
| PLAT779_ALERT_4_G | Suspect or Irrelevant (Bond) Angle(s) in CIF ... |                | 6.70    | Deg.         |
|                   | N9A -C7A -H7A 1_555 1_555 1_555 .....            | #              | 15      | Check        |
| PLAT779_ALERT_4_G | Suspect or Irrelevant (Bond) Angle(s) in CIF ... |                | 10.90   | Deg.         |
|                   | C7A -N9A -H7A 1_555 1_555 1_555 .....            | #              | 16      | Check        |
| PLAT789_ALERT_4_G | Atoms with Negative _atom_site_disorder_group #  |                | 24      | Check        |
| PLAT811_ALERT_5_G | No ADDSYM Analysis: Too Many Excluded Atoms .... |                | !       | Info         |
| PLAT860_ALERT_3_G | Number of Least-Squares Restraints .....         |                | 120     | Note         |
| PLAT883_ALERT_1_G | No Info/Value for _atom_sites_solution_primary . |                | Please  | Do !         |
| PLAT910_ALERT_3_G | Missing # of FCF Reflection(s) Below Theta(Min). |                | 4       | Note         |
| PLAT913_ALERT_3_G | Missing # of Very Strong Reflections in FCF .... |                | 3       | Note         |

---

|    |                      |                                                              |
|----|----------------------|--------------------------------------------------------------|
| 2  | <b>ALERT level A</b> | = Most likely a serious problem - resolve or explain         |
| 5  | <b>ALERT level B</b> | = A potentially serious problem, consider carefully          |
| 17 | <b>ALERT level C</b> | = Check. Ensure it is not caused by an omission or oversight |
| 48 | <b>ALERT level G</b> | = General information/check it is not something unexpected   |

  

|    |              |                                                              |
|----|--------------|--------------------------------------------------------------|
| 12 | ALERT type 1 | CIF construction/syntax error, inconsistent or missing data  |
| 14 | ALERT type 2 | Indicator that the structure model may be wrong or deficient |
| 9  | ALERT type 3 | Indicator that the structure quality may be low              |
| 34 | ALERT type 4 | Improvement, methodology, query or suggestion                |
| 3  | ALERT type 5 | Informative message, check                                   |

---

It is advisable to attempt to resolve as many as possible of the alerts in all categories. Often the minor alerts point to easily fixed oversights, errors and omissions in your CIF or refinement strategy, so attention to these fine details can be worthwhile. In order to resolve some of the more serious problems it may be necessary to carry out additional measurements or structure refinements. However, the purpose of your study may justify the reported deviations and the more serious of these should normally be commented upon in the discussion or experimental section of a paper or in the "special\_details" fields of the CIF. checkCIF was carefully designed to identify outliers and unusual parameters, but every test has its limitations and alerts that are not important in a particular case may appear. Conversely, the absence of alerts does not guarantee there are no aspects of the results needing attention. It is up to the individual to critically assess their own results and, if necessary, seek expert advice.

### Publication of your CIF in IUCr journals

A basic structural check has been run on your CIF. These basic checks will be run on all CIFs submitted for publication in IUCr journals (*Acta Crystallographica*, *Journal of Applied Crystallography*, *Journal of Synchrotron Radiation*); however, if you intend to submit to *Acta Crystallographica Section C* or *E* or *IUCrData*, you should make sure that full publication checks are run on the final version of your CIF prior to submission.

### Publication of your CIF in other journals

Please refer to the *Notes for Authors* of the relevant journal for any special instructions relating to CIF submission.

### Validation response form

Please find below a validation response form (VRF) that can be filled in and pasted into your CIF.

```
# start Validation Reply Form
_vrf_THETM01_muf-92-3h-42pc
;
PROBLEM: The value of sine(theta_max)/wavelength is less than 0.550
RESPONSE: ...
;
_vrf_PLAT601_muf-92-3h-42pc
;
```

PROBLEM: Unit Cell Contains Solvent Accessible VOIDS of . 1549 Ang\*\*3  
 RESPONSE: ...  
 ;  
 # end Validation Reply Form

PLATON version of 20/01/2022; check.def file version of 19/01/2022

Datablock muf-92-3h-42pc - ellipsoid plot

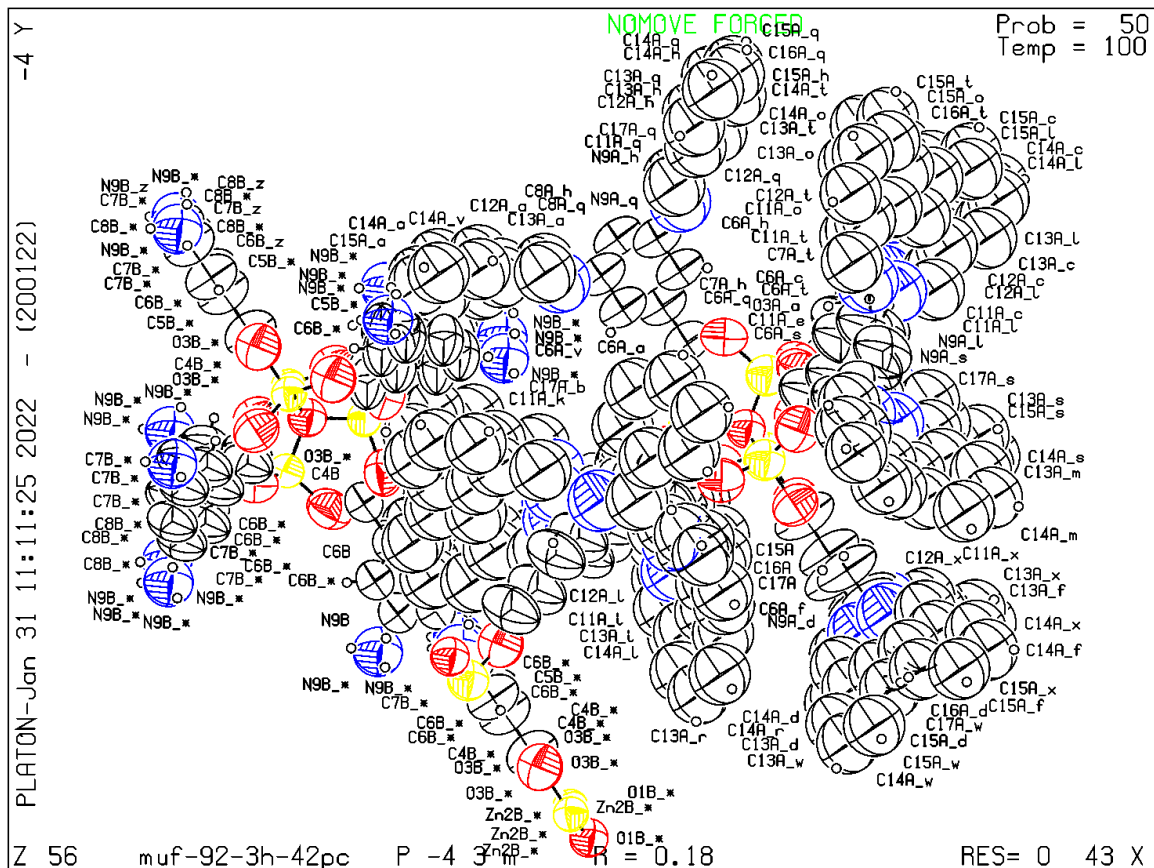

Supplement: Supplementary file 6 [file 7136060c374242e9c3443a72.pdf]
