# Supplementary material for: Hetero-interpenetrated metal-organic frameworks
Source: Research Square preprint supplement (doi:10.21203/rs.3.rs-1342292/v1), 2022-02-17

## checkCIF/PLATON report

Structure factors have been supplied for datablock(s) muf-91-12h-71pc

THIS REPORT IS FOR GUIDANCE ONLY. IF USED AS PART OF A REVIEW PROCEDURE FOR PUBLICATION, IT SHOULD NOT REPLACE THE EXPERTISE OF AN EXPERIENCED CRYSTALLOGRAPHIC REFEREE.

No syntax errors found.      CIF dictionary      Interpreting this report

### Datablock: muf-91-12h-71pc

---

Bond precision:      = 0.0000 A

Wavelength=0.71075

Cell:                      a=17.159(5)                      b=17.159(5)                      c=17.159(5)

alpha=90

beta=90

gamma=90

Temperature:              100 K

|                        | Calculated                         | Reported                                              |
|------------------------|------------------------------------|-------------------------------------------------------|
| Volume                 | 5052(4)                            | 5052(5)                                               |
| Space group            | P -4 3 m                           | P -4 3 m                                              |
| Hall group             | P -4 2 3                           | P -4 2 3                                              |
| Moiety formula         | C14.22 H8.12 N0.75 O2.78<br>Zn0.85 | C84 H48 N6 O13 Zn4, C29.757<br>H17.004 O9.211 Zn2.834 |
| Sum formula            | C14.22 H8.12 N0.75 O2.78<br>Zn0.85 | C113.76 H65 N6 O22.21<br>Zn6.83                       |
| Mr                     | 289.70                             | 2317.67                                               |
| Dx, g cm <sup>-3</sup> | 0.762                              | 0.762                                                 |
| Z                      | 8                                  | 1                                                     |
| Mu (mm <sup>-1</sup> ) | 0.836                              | 0.836                                                 |
| F000                   | 1172.0                             | 1172.0                                                |
| F000'                  | 1174.42                            |                                                       |
| h, k, lmax             | 15, 15, 15                         | 15, 15, 15                                            |
| Nref                   | 800[ 454]                          | 803                                                   |
| Tmin, Tmax             |                                    | 0.457, 0.746                                          |
| Tmin'                  |                                    |                                                       |

Correction method= # Reported T Limits: Tmin=0.457 Tmax=0.746

AbsCorr = MULTII-SCAN

Data completeness= 1.77/1.00

Theta(max)= 18.835

R(reflections)= 0.1634( 577)

wR2(reflections)=  
0.4055( 803)

S = 1.706

Npar= 34

The following ALERTS were generated. Each ALERT has the format

**test-name\_ALERT\_alert-type\_alert-level.**

Click on the hyperlinks for more details of the test.

---

### Alert level A

THETM01\_ALERT\_3\_A The value of sine(theta\_max)/wavelength is less than 0.550

Calculated sin(theta\_max)/wavelength = 0.4542

PLAT245\_ALERT\_2\_A U(iso) H13 Smaller than U(eq) N1 by 0.202 Ang\*\*2

PLAT601\_ALERT\_2\_A Unit Cell Contains Solvent Accessible VOIDS of . 1647 Ang\*\*3

---

### Alert level B

PLAT031\_ALERT\_4\_B Refined Extinction Parameter Within Range of ... 1.500 Sigma

PLAT049\_ALERT\_1\_B Calculated Density Less Than 1.0 gcm-3 ..... 0.7618 Check

PLAT082\_ALERT\_2\_B High R1 Value ..... 0.16 Report

PLAT084\_ALERT\_3\_B High wR2 Value (i.e. > 0.25) ..... 0.41 Report

PLAT934\_ALERT\_3\_B Number of (Iobs-Icalc)/Sigma(W) > 10 Outliers .. 2 Check

PLAT987\_ALERT\_1\_B The Flack x is >> 0 - Do a BASF/TWIN Refinement Please Check

---

### Alert level C

STRVA01\_ALERT\_4\_C Flack test results are ambiguous.

From the CIF: \_refine\_ls\_abs\_structure\_Flack 0.320

From the CIF: \_refine\_ls\_abs\_structure\_Flack\_su 0.050

PLAT041\_ALERT\_1\_C Calc. and Reported SumFormula Strings Differ Please Check

PLAT053\_ALERT\_1\_C Minimum Crystal Dimension Missing (or Error) ... Please Check

PLAT054\_ALERT\_1\_C Medium Crystal Dimension Missing (or Error) ... Please Check

PLAT055\_ALERT\_1\_C Maximum Crystal Dimension Missing (or Error) ... Please Check

PLAT077\_ALERT\_4\_C Unitcell Contains Non-integer Number of Atoms .. Please Check

PLAT250\_ALERT\_2\_C Large U3/U1 Ratio for Average U(i,j) Tensor .... 2.8 Note

PLAT260\_ALERT\_2\_C Large Average Ueq of Residue Including Zn1 0.256 Check

PLAT329\_ALERT\_4\_C Carbon Atom Hybridisation Unclear for ..... C13 Check

PLAT918\_ALERT\_3\_C Reflection(s) with I(obs) much Smaller I(calc) . 2 Check

PLAT927\_ALERT\_1\_C Reported and Calculated wR2 Differ by ..... -0.0024 Check

PLAT939\_ALERT\_3\_C Large Value of Not (SHELXL) Weight Optimized S . 44.42 Check

PLAT975\_ALERT\_2\_C Check Calcd Resid. Dens. 0.90Ang From O1 . 0.68 eA-3

---

### Alert level G

FORMU01\_ALERT\_2\_G There is a discrepancy between the atom counts in the

\_chemical\_formula\_sum and the formula from the \_atom\_site\* data.

Atom count from \_chemical\_formula\_sum: C113.7599 H65 N6 O22.21 Zn6.83

Atom count from the \_atom\_site data: C82.18200 H56.496 N6 O10.31919 Z

ABSMU01\_ALERT\_1\_G Calculation of \_exptl\_absorpt\_correction\_mu

not performed for this radiation type.

CELLZ01\_ALERT\_1\_G Difference between formula and atom\_site contents detected.

CELLZ01\_ALERT\_1\_G ALERT: Large difference may be due to a

symmetry error - see SYMMG tests

From the CIF: \_cell\_formula\_units\_Z 1

From the CIF: \_chemical\_formula\_sum C113.76 H65 N6 O22.21 Zn6.83  
 TEST: Compare cell contents of formula and atom\_site data

| atom | Z*formula | cif sites | diff  |  |
|------|-----------|-----------|-------|--|
| C    | 113.76    | 82.18     | 31.58 |  |
| H    | 65.00     | 56.50     | 8.50  |  |
| N    | 6.00      | 6.00      | 0.00  |  |
| O    | 22.21     | 10.32     | 11.89 |  |
| Zn   | 6.83      | 1.14      | 5.69  |  |

  

|                   |                                                  |                |        |              |
|-------------------|--------------------------------------------------|----------------|--------|--------------|
| PLAT002_ALERT_2_G | Number of Distance or Angle Restraints on AtSite |                | 10     | Note         |
| PLAT003_ALERT_2_G | Number of Uiso or Uij Restrained non-H Atoms ... |                | 18     | Report       |
| PLAT007_ALERT_5_G | Number of Unrefined Donor-H Atoms .....          |                | 1      | Report       |
| PLAT042_ALERT_1_G | Calc. and Reported Moiety Formula Strings Differ |                |        | Please Check |
| PLAT045_ALERT_1_G | Calculated and Reported Z Differ by a Factor ... |                | 8.0000 | Check        |
| PLAT072_ALERT_2_G | SHELXL First Parameter in WGHT Unusually Large   |                | 0.20   | Report       |
| PLAT171_ALERT_4_G | The CIF-Embedded .res File Contains EADP Records |                | 3      | Report       |
| PLAT172_ALERT_4_G | The CIF-Embedded .res File Contains DFIX Records |                | 11     | Report       |
| PLAT174_ALERT_4_G | The CIF-Embedded .res File Contains FLAT Records |                | 3      | Report       |
| PLAT178_ALERT_4_G | The CIF-Embedded .res File Contains SIMU Records |                | 2      | Report       |
| PLAT186_ALERT_4_G | The CIF-Embedded .res File Contains ISOR Records |                | 1      | Report       |
| PLAT300_ALERT_4_G | Atom Site Occupancy of Zn0A                      | Constrained at | 0.1667 | Check        |
| PLAT300_ALERT_4_G | Atom Site Occupancy of O2                        | Constrained at | 0.5    | Check        |
| PLAT300_ALERT_4_G | Atom Site Occupancy of O1                        | Constrained at | 0.0417 | Check        |
| PLAT300_ALERT_4_G | Atom Site Occupancy of C12                       | Constrained at | 0.5    | Check        |
| PLAT300_ALERT_4_G | Atom Site Occupancy of C13                       | Constrained at | 0.5    | Check        |
| PLAT300_ALERT_4_G | Atom Site Occupancy of N1                        | Constrained at | 0.25   | Check        |
| PLAT300_ALERT_4_G | Atom Site Occupancy of C10                       | Constrained at | 0.25   | Check        |
| PLAT300_ALERT_4_G | Atom Site Occupancy of C11                       | Constrained at | 0.25   | Check        |
| PLAT300_ALERT_4_G | Atom Site Occupancy of C14                       | Constrained at | 0.25   | Check        |
| PLAT300_ALERT_4_G | Atom Site Occupancy of C15                       | Constrained at | 0.25   | Check        |
| PLAT300_ALERT_4_G | Atom Site Occupancy of C16                       | Constrained at | 0.25   | Check        |
| PLAT300_ALERT_4_G | Atom Site Occupancy of C17                       | Constrained at | 0.25   | Check        |
| PLAT300_ALERT_4_G | Atom Site Occupancy of C18                       | Constrained at | 0.25   | Check        |
| PLAT300_ALERT_4_G | Atom Site Occupancy of C19                       | Constrained at | 0.25   | Check        |
| PLAT300_ALERT_4_G | Atom Site Occupancy of C20                       | Constrained at | 0.25   | Check        |
| PLAT300_ALERT_4_G | Atom Site Occupancy of C21                       | Constrained at | 0.25   | Check        |
| PLAT300_ALERT_4_G | Atom Site Occupancy of H12                       | Constrained at | 0.5    | Check        |
| PLAT300_ALERT_4_G | Atom Site Occupancy of H13                       | Constrained at | 0.25   | Check        |
| PLAT300_ALERT_4_G | Atom Site Occupancy of H17                       | Constrained at | 0.25   | Check        |
| PLAT300_ALERT_4_G | Atom Site Occupancy of H18                       | Constrained at | 0.25   | Check        |
| PLAT300_ALERT_4_G | Atom Site Occupancy of H19                       | Constrained at | 0.25   | Check        |
| PLAT300_ALERT_4_G | Atom Site Occupancy of H20                       | Constrained at | 0.25   | Check        |
| PLAT300_ALERT_4_G | Atom Site Occupancy of H21                       | Constrained at | 0.25   | Check        |
| PLAT301_ALERT_3_G | Main Residue Disorder .....(Resd 1 )             |                | 100%   | Note         |
| PLAT304_ALERT_4_G | Non-Integer Number of Atoms in ..... (Resd 1 )   |                | 26.72  | Check        |
| PLAT315_ALERT_2_G | Singly Bonded Carbon Detected (H-atoms Missing). |                | C14    | Check        |
| PLAT315_ALERT_2_G | Singly Bonded Carbon Detected (H-atoms Missing). |                | C34    | Check        |
| PLAT432_ALERT_2_G | Short Inter X...Y Contact C14 ..C15              |                | 3.19   | Ang.         |
|                   | 1-x,y,1-z =                                      |                | 9_656  | Check        |
| PLAT432_ALERT_2_G | Short Inter X...Y Contact C14 ..C15              |                | 3.19   | Ang.         |
|                   | 1-z,y,1-x =                                      |                | 23_656 | Check        |
| PLAT720_ALERT_4_G | Number of Unusual/Non-Standard Labels .....      |                | 1      | Note         |
| PLAT779_ALERT_4_G | Suspect or Irrelevant (Bond) Angle(s) in CIF ... |                | 6.70   | Deg.         |
|                   | N1 -C13 -H13 1_555 1_555 1_555 .....             | #              | 13     | Check        |
| PLAT779_ALERT_4_G | Suspect or Irrelevant (Bond) Angle(s) in CIF ... |                | 10.90  | Deg.         |
|                   | C13 -N1 -H13 1_555 1_555 1_555 .....             | #              | 14     | Check        |
| PLAT789_ALERT_4_G | Atoms with Negative _atom_site_disorder_group #  |                | 31     | Check        |

|                   |                                                   |    |             |
|-------------------|---------------------------------------------------|----|-------------|
| PLAT860_ALERT_3_G | Number of Least-Squares Restraints .....          | 75 | Note        |
| PLAT883_ALERT_1_G | No Info/Value for _atom_sites_solution_primary .  |    | Please Do ! |
| PLAT910_ALERT_3_G | Missing # of FCF Reflection(s) Below Theta (Min). | 4  | Note        |
| PLAT913_ALERT_3_G | Missing # of Very Strong Reflections in FCF ....  | 2  | Note        |

---

3 **ALERT level A** = Most likely a serious problem - resolve or explain  
 6 **ALERT level B** = A potentially serious problem, consider carefully  
 13 **ALERT level C** = Check. Ensure it is not caused by an omission or oversight  
 52 **ALERT level G** = General information/check it is not something unexpected

13 ALERT type 1 CIF construction/syntax error, inconsistent or missing data  
 14 ALERT type 2 Indicator that the structure model may be wrong or deficient  
 9 ALERT type 3 Indicator that the structure quality may be low  
 37 ALERT type 4 Improvement, methodology, query or suggestion  
 1 ALERT type 5 Informative message, check

---

It is advisable to attempt to resolve as many as possible of the alerts in all categories. Often the minor alerts point to easily fixed oversights, errors and omissions in your CIF or refinement strategy, so attention to these fine details can be worthwhile. In order to resolve some of the more serious problems it may be necessary to carry out additional measurements or structure refinements. However, the purpose of your study may justify the reported deviations and the more serious of these should normally be commented upon in the discussion or experimental section of a paper or in the "special\_details" fields of the CIF. checkCIF was carefully designed to identify outliers and unusual parameters, but every test has its limitations and alerts that are not important in a particular case may appear. Conversely, the absence of alerts does not guarantee there are no aspects of the results needing attention. It is up to the individual to critically assess their own results and, if necessary, seek expert advice.

### Publication of your CIF in IUCr journals

A basic structural check has been run on your CIF. These basic checks will be run on all CIFs submitted for publication in IUCr journals (*Acta Crystallographica*, *Journal of Applied Crystallography*, *Journal of Synchrotron Radiation*); however, if you intend to submit to *Acta Crystallographica Section C* or *E* or *IUCrData*, you should make sure that full publication checks are run on the final version of your CIF prior to submission.

### Publication of your CIF in other journals

Please refer to the *Notes for Authors* of the relevant journal for any special instructions relating to CIF submission.

### Validation response form

Please find below a validation response form (VRF) that can be filled in and pasted into your CIF.

```
# start Validation Reply Form
_vrf_THETM01_muf-91-12h-71pc
;
PROBLEM: The value of sine(theta_max)/wavelength is less than 0.550
```

RESPONSE: ...

;

\_vrf\_PLAT245\_muf-91-12h-71pc

;

PROBLEM: U(iso) H13                      Smaller than U(eq) N1                      by                      0.202 Ang\*\*2

RESPONSE: ...

;

\_vrf\_PLAT601\_muf-91-12h-71pc

;

PROBLEM: Unit Cell Contains Solvent Accessible VOIDS of .                      1647 Ang\*\*3

RESPONSE: ...

;

# end Validation Reply Form

---

## PLATON version of 20/01/2022; check.def file version of 19/01/2022

Datablock muf-91-12h-71pc - ellipsoid plot

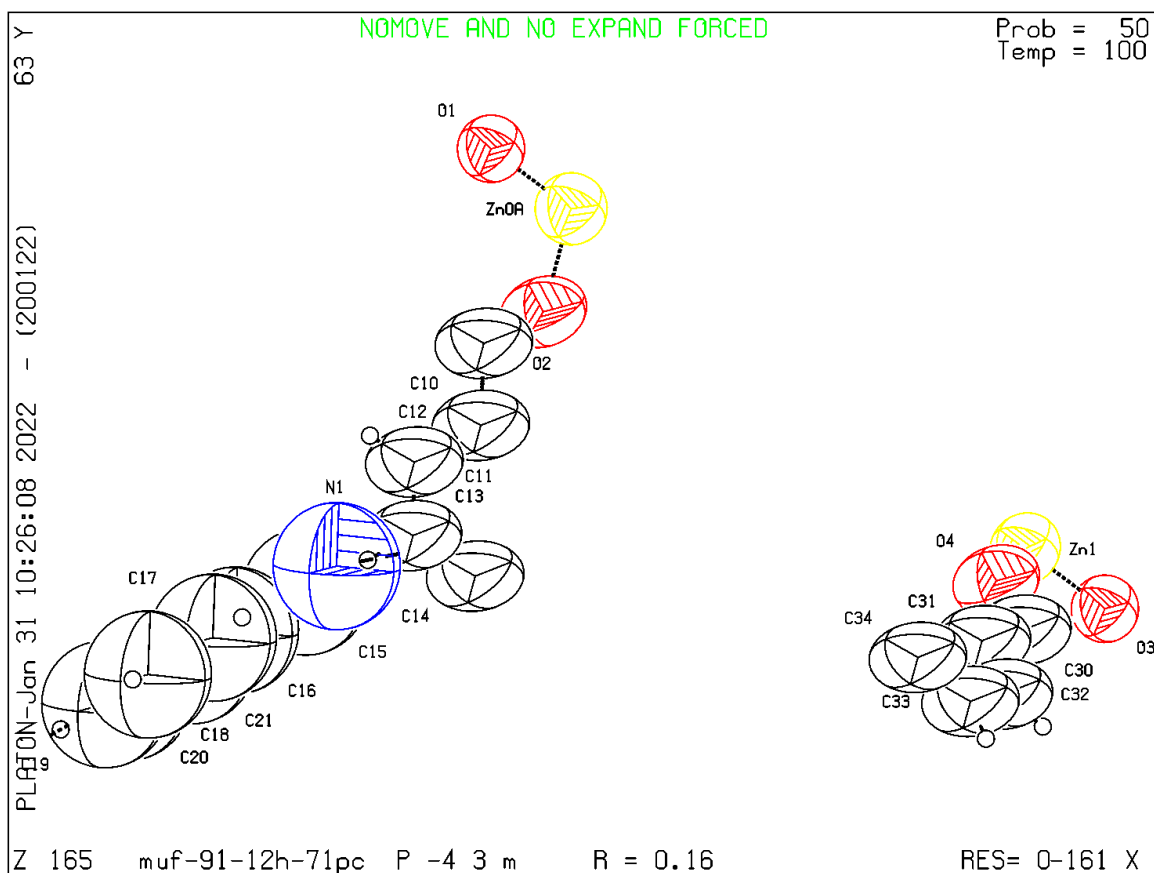

Supplement: Supplementary file 9 [file a0d9370b3c0cc2b3acabc70e.pdf]
