# Supplementary material for: Hetero-interpenetrated metal-organic frameworks
Source: Research Square preprint supplement (doi:10.21203/rs.3.rs-1342292/v1), 2022-02-17

## checkCIF/PLATON report

Structure factors have been supplied for datablock(s) muf-91-9h-76pc

THIS REPORT IS FOR GUIDANCE ONLY. IF USED AS PART OF A REVIEW PROCEDURE FOR PUBLICATION, IT SHOULD NOT REPLACE THE EXPERTISE OF AN EXPERIENCED CRYSTALLOGRAPHIC REFEREE.

No syntax errors found.      CIF dictionary      Interpreting this report

### Datablock: muf-91-9h-76pc

---

Bond precision:      = 0.0000 Å

Wavelength=0.95372

Cell:                      a=16.96(2)  
                              alpha=90

b=16.96(2)  
beta=90

c=16.96(2)  
gamma=90

Temperature:            100 K

|                        | Calculated                         | Reported                                              |
|------------------------|------------------------------------|-------------------------------------------------------|
| Volume                 | 4878(17)                           | 4882(17)                                              |
| Space group            | P -4 3 m                           | P -4 3 m                                              |
| Hall group             | P -4 2 3                           | P -4 2 3                                              |
| Moiety formula         | C14.49 H8.28 N0.75 O2.86<br>Zn0.88 | C84 H48 N6 O13 Zn4, C31.906<br>H18.232 O9.876 Zn3.039 |
| Sum formula            | C14.49 H8.28 N0.75 O2.86<br>Zn0.88 | C115.89 H66.22 N6 O22.87<br>Zn7.04                    |
| Mr                     | 296.27                             | 2368.77                                               |
| Dx, g cm <sup>-3</sup> | 0.807                              | 0.806                                                 |
| Z                      | 8                                  | 1                                                     |
| Mu (mm <sup>-1</sup> ) | 1.956                              | 1.926                                                 |
| F000                   | 1198.3                             | 1198.0                                                |
| F000'                  | 1198.46                            |                                                       |
| h, k, lmax             | 14, 14, 14                         | 14, 14, 14                                            |
| Nref                   | 601[ 345]                          | 604                                                   |
| Tmin, Tmax             |                                    | 0.447, 0.746                                          |
| Tmin'                  |                                    |                                                       |

Correction method= # Reported T Limits: Tmin=0.447 Tmax=0.746

AbsCorr = MULTI-SCAN

Data completeness= 1.75/1.00

Theta(max)= 23.300

R(reflections)= 0.2831( 399)

wR2(reflections)=  
0.6142( 604)

S = 2.606

Npar= 33

The following ALERTS were generated. Each ALERT has the format

**test-name\_ALERT\_alert-type\_alert-level.**

Click on the hyperlinks for more details of the test.

---

### Alert level A

THETM01\_ALERT\_3\_A The value of sine(theta\_max)/wavelength is less than 0.550

Calculated sin(theta\_max)/wavelength = 0.4147

|                                                                    |      |        |
|--------------------------------------------------------------------|------|--------|
| PLAT082_ALERT_2_A High R1 Value .....                              | 0.28 | Report |
| PLAT084_ALERT_3_A High wR2 Value (i.e. > 0.25) .....               | 0.61 | Report |
| PLAT601_ALERT_2_A Unit Cell Contains Solvent Accessible VOIDS of . | 1550 | Ang**3 |
| PLAT973_ALERT_2_A Check Calcd Positive Resid. Density on Zn0A      | 2.39 | eA-3   |

---

### Alert level B

RINTA01\_ALERT\_3\_B The value of Rint is greater than 0.18

Rint given 0.182

|                                                                    |        |        |
|--------------------------------------------------------------------|--------|--------|
| PLAT020_ALERT_3_B The Value of Rint is Greater Than 0.12 .....     | 0.182  | Report |
| PLAT049_ALERT_1_B Calculated Density Less Than 1.0 gcm-3 .....     | 0.8070 | Check  |
| PLAT934_ALERT_3_B Number of (Iobs-Icalc)/Sigma(W) > 10 Outliers .. | 3      | Check  |
| PLAT971_ALERT_2_B Check Calcd Resid. Dens. 1.81Ang From O1         | 3.34   | eA-3   |

---

### Alert level C

DIFMX02\_ALERT\_1\_C The maximum difference density is > 0.1\*ZMAX\*0.75

The relevant atom site should be identified.

GOODF01\_ALERT\_2\_C The least squares goodness of fit parameter lies  
outside the range 0.80 <> 2.00

Goodness of fit given = 2.606

STRVA01\_ALERT\_4\_C Flack test results are ambiguous.

From the CIF: \_refine\_ls\_abs\_structure\_Flack 0.430

From the CIF: \_refine\_ls\_abs\_structure\_Flack\_su 0.020

|                                                                    |         |        |
|--------------------------------------------------------------------|---------|--------|
| PLAT041_ALERT_1_C Calc. and Reported SumFormula Strings Differ     | Please  | Check  |
| PLAT053_ALERT_1_C Minimum Crystal Dimension Missing (or Error) ... | Please  | Check  |
| PLAT054_ALERT_1_C Medium Crystal Dimension Missing (or Error) ...  | Please  | Check  |
| PLAT055_ALERT_1_C Maximum Crystal Dimension Missing (or Error) ... | Please  | Check  |
| PLAT087_ALERT_2_C Unsatisfactory S value (Too High) .....          | 2.61    | Check  |
| PLAT094_ALERT_2_C Ratio of Maximum / Minimum Residual Density .... | 3.47    | Report |
| PLAT097_ALERT_2_C Large Reported Max. (Positive) Residual Density  | 2.62    | eA-3   |
| PLAT148_ALERT_3_C s.u. on the a - Axis is (Too) Large ....         | 0.020   | Ang.   |
| PLAT250_ALERT_2_C Large U3/U1 Ratio for Average U(i,j) Tensor .... | 2.4     | Note   |
| PLAT260_ALERT_2_C Large Average Ueq of Residue Including Zn1       | 0.272   | Check  |
| PLAT331_ALERT_2_C Small Aver Phenyl C-C Dist C16 --C21 .           | 1.37    | Ang.   |
| PLAT906_ALERT_3_C Large K Value in the Analysis of Variance .....  | 33.852  | Check  |
| PLAT906_ALERT_3_C Large K Value in the Analysis of Variance .....  | 2.971   | Check  |
| PLAT906_ALERT_3_C Large K Value in the Analysis of Variance .....  | 2.646   | Check  |
| PLAT926_ALERT_1_C Reported and Calculated R1 Differ by .....       | -0.0016 | Check  |

---

### Alert level G

FORMU01\_ALERT\_1\_G There is a discrepancy between the atom counts in the  
 \_chemical\_formula\_sum and \_chemical\_formula\_moiety. This is  
 usually due to the moiety formula being in the wrong format.  
 Atom count from \_chemical\_formula\_sum: C115.89 H66.21999 N6 O22.87 Z  
 Atom count from \_chemical\_formula\_moiety: C115.906 H66.23200 N6 O22.875

FORMU01\_ALERT\_2\_G There is a discrepancy between the atom counts in the  
 \_chemical\_formula\_sum and the formula from the \_atom\_site\* data.  
 Atom count from \_chemical\_formula\_sum: C115.89 H66.21999 N6 O22.87 Zn7.  
 Atom count from the \_atom\_site data: C83.03998 H54.12 N6 O10.63369 Zn

ABSMU01\_ALERT\_1\_G Calculation of \_exptl\_absorpt\_correction\_mu  
 not performed for this radiation type.

CELLZ01\_ALERT\_1\_G Difference between formula and atom\_site contents detected.

CELLZ01\_ALERT\_1\_G ALERT: Large difference may be due to a  
 symmetry error - see SYMMG tests  
 From the CIF: \_cell\_formula\_units\_Z 1  
 From the CIF: \_chemical\_formula\_sum C115.89 H66.22 N6 O22.87 Zn7.04  
 TEST: Compare cell contents of formula and atom\_site data

| atom | Z*formula | cif sites | diff  |
|------|-----------|-----------|-------|
| C    | 115.89    | 83.04     | 32.85 |
| H    | 66.22     | 54.12     | 12.10 |
| N    | 6.00      | 6.00      | 0.00  |
| O    | 22.87     | 10.63     | 12.24 |
| Zn   | 7.04      | 1.17      | 5.87  |

|                   |                                                  |         |              |
|-------------------|--------------------------------------------------|---------|--------------|
| PLAT002_ALERT_2_G | Number of Distance or Angle Restraints on AtSite | 10      | Note         |
| PLAT003_ALERT_2_G | Number of Uiso or Uij Restrained non-H Atoms ... | 19      | Report       |
| PLAT007_ALERT_5_G | Number of Unrefined Donor-H Atoms .....          | 1       | Report       |
| PLAT042_ALERT_1_G | Calc. and Reported Moiety Formula Strings Differ |         | Please Check |
| PLAT045_ALERT_1_G | Calculated and Reported Z Differ by a Factor ... | 8.0000  | Check        |
| PLAT068_ALERT_1_G | Reported F000 Differs from Calcd (or Missing)... |         | Please Check |
| PLAT072_ALERT_2_G | SHELXL First Parameter in WGHT Unusually Large   | 0.20    | Report       |
| PLAT092_ALERT_4_G | Check: Wavelength Given is not Cu,Ga,Mo,Ag,In Ka | 0.95372 | Ang.         |
| PLAT171_ALERT_4_G | The CIF-Embedded .res File Contains EADP Records | 3       | Report       |
| PLAT172_ALERT_4_G | The CIF-Embedded .res File Contains DFIX Records | 11      | Report       |
| PLAT174_ALERT_4_G | The CIF-Embedded .res File Contains FLAT Records | 3       | Report       |
| PLAT178_ALERT_4_G | The CIF-Embedded .res File Contains SIMU Records | 2       | Report       |
| PLAT186_ALERT_4_G | The CIF-Embedded .res File Contains ISOR Records | 2       | Report       |
| PLAT300_ALERT_4_G | Atom Site Occupancy of Zn0A                      | 0.1667  | Check        |
| PLAT300_ALERT_4_G | Atom Site Occupancy of O2                        | 0.5     | Check        |
| PLAT300_ALERT_4_G | Atom Site Occupancy of O1                        | 0.0417  | Check        |
| PLAT300_ALERT_4_G | Atom Site Occupancy of C12                       | 0.5     | Check        |
| PLAT300_ALERT_4_G | Atom Site Occupancy of C13                       | 0.5     | Check        |
| PLAT300_ALERT_4_G | Atom Site Occupancy of N1                        | 0.25    | Check        |
| PLAT300_ALERT_4_G | Atom Site Occupancy of C10                       | 0.25    | Check        |
| PLAT300_ALERT_4_G | Atom Site Occupancy of C11                       | 0.25    | Check        |
| PLAT300_ALERT_4_G | Atom Site Occupancy of C14                       | 0.25    | Check        |
| PLAT300_ALERT_4_G | Atom Site Occupancy of C15                       | 0.25    | Check        |
| PLAT300_ALERT_4_G | Atom Site Occupancy of C16                       | 0.25    | Check        |
| PLAT300_ALERT_4_G | Atom Site Occupancy of C17                       | 0.25    | Check        |
| PLAT300_ALERT_4_G | Atom Site Occupancy of C18                       | 0.25    | Check        |
| PLAT300_ALERT_4_G | Atom Site Occupancy of C19                       | 0.25    | Check        |
| PLAT300_ALERT_4_G | Atom Site Occupancy of C20                       | 0.25    | Check        |
| PLAT300_ALERT_4_G | Atom Site Occupancy of C21                       | 0.25    | Check        |
| PLAT300_ALERT_4_G | Atom Site Occupancy of H12                       | 0.5     | Check        |
| PLAT300_ALERT_4_G | Atom Site Occupancy of H13                       | 0.25    | Check        |
| PLAT300_ALERT_4_G | Atom Site Occupancy of H17                       | 0.25    | Check        |
| PLAT300_ALERT_4_G | Atom Site Occupancy of H18                       | 0.25    | Check        |

|                   |                                                  |                             |         |             |
|-------------------|--------------------------------------------------|-----------------------------|---------|-------------|
| PLAT300_ALERT_4_G | Atom Site Occupancy of H19                       | Constrained at              | 0.25    | Check       |
| PLAT300_ALERT_4_G | Atom Site Occupancy of H20                       | Constrained at              | 0.25    | Check       |
| PLAT300_ALERT_4_G | Atom Site Occupancy of H21                       | Constrained at              | 0.25    | Check       |
| PLAT301_ALERT_3_G | Main Residue Disorder .....                      | (Resd 1 )                   | 100%    | Note        |
| PLAT304_ALERT_4_G | Non-Integer Number of Atoms in .....             | (Resd 1 )                   | 27.26   | Check       |
| PLAT315_ALERT_2_G | Singly Bonded Carbon Detected (H-atoms Missing). |                             | C14     | Check       |
| PLAT315_ALERT_2_G | Singly Bonded Carbon Detected (H-atoms Missing). |                             | C34     | Check       |
| PLAT432_ALERT_2_G | Short Inter X...Y Contact C14                    | ..C15                       | 3.15    | Ang.        |
|                   |                                                  | 1-x,y,1-z =                 | 9_656   | Check       |
| PLAT432_ALERT_2_G | Short Inter X...Y Contact C14                    | ..C15                       | 3.15    | Ang.        |
|                   |                                                  | 1-z,y,1-x =                 | 23_656  | Check       |
| PLAT720_ALERT_4_G | Number of Unusual/Non-Standard Labels .....      |                             | 1       | Note        |
| PLAT789_ALERT_4_G | Atoms with Negative _atom_site_disorder_group #  |                             | 31      | Check       |
| PLAT860_ALERT_3_G | Number of Least-Squares Restraints .....         |                             | 81      | Note        |
| PLAT883_ALERT_1_G | No Info/Value for _atom_sites_solution_primary . |                             |         | Please Do ! |
| PLAT910_ALERT_3_G | Missing # of FCF Reflection(s) Below Theta(Min). |                             | 4       | Note        |
| PLAT913_ALERT_3_G | Missing # of Very Strong Reflections in FCF .... |                             | 2       | Note        |
| PLAT984_ALERT_1_G | The O-f' = 0.0218                                | Deviates from the B&C-Value | 0.0205  | Check       |
| PLAT984_ALERT_1_G | The Zn-f' = -0.1382                              | Deviates from the B&C-Value | -0.1517 | Check       |
| PLAT985_ALERT_1_G | The Zn-f" = 2.4327                               | Deviates from the B&C-Value | 2.3734  | Check       |

---

5 **ALERT level A** = Most likely a serious problem - resolve or explain  
 5 **ALERT level B** = A potentially serious problem, consider carefully  
 18 **ALERT level C** = Check. Ensure it is not caused by an omission or oversight  
 56 **ALERT level G** = General information/check it is not something unexpected

18 ALERT type 1 CIF construction/syntax error, inconsistent or missing data  
 19 ALERT type 2 Indicator that the structure model may be wrong or deficient  
 13 ALERT type 3 Indicator that the structure quality may be low  
 33 ALERT type 4 Improvement, methodology, query or suggestion  
 1 ALERT type 5 Informative message, check

---

It is advisable to attempt to resolve as many as possible of the alerts in all categories. Often the minor alerts point to easily fixed oversights, errors and omissions in your CIF or refinement strategy, so attention to these fine details can be worthwhile. In order to resolve some of the more serious problems it may be necessary to carry out additional measurements or structure refinements. However, the purpose of your study may justify the reported deviations and the more serious of these should normally be commented upon in the discussion or experimental section of a paper or in the "special\_details" fields of the CIF. checkCIF was carefully designed to identify outliers and unusual parameters, but every test has its limitations and alerts that are not important in a particular case may appear. Conversely, the absence of alerts does not guarantee there are no aspects of the results needing attention. It is up to the individual to critically assess their own results and, if necessary, seek expert advice.

### Publication of your CIF in IUCr journals

A basic structural check has been run on your CIF. These basic checks will be run on all CIFs submitted for publication in IUCr journals (*Acta Crystallographica*, *Journal of Applied Crystallography*, *Journal of Synchrotron Radiation*); however, if you intend to submit to *Acta Crystallographica Section C* or *E* or *IUCrData*, you should make sure that full publication checks are run on the final version of your CIF prior to submission.

### Publication of your CIF in other journals

Please refer to the *Notes for Authors* of the relevant journal for any special instructions relating to CIF submission.

### Validation response form

Please find below a validation response form (VRF) that can be filled in and pasted into your CIF.

```
# start Validation Reply Form
_vrf_THETM01_muf-91-9h-76pc
;
PROBLEM: The value of sine(theta_max)/wavelength is less than 0.550
RESPONSE: ...
;
_vrf_PLAT082_muf-91-9h-76pc
;
PROBLEM: High R1 Value ..... 0.28 Report
RESPONSE: ...
;
_vrf_PLAT084_muf-91-9h-76pc
;
PROBLEM: High wR2 Value (i.e. > 0.25) ..... 0.61 Report
RESPONSE: ...
;
_vrf_PLAT601_muf-91-9h-76pc
;
PROBLEM: Unit Cell Contains Solvent Accessible VOIDS of . 1550 Ang**3
RESPONSE: ...
;
_vrf_PLAT973_muf-91-9h-76pc
```

```

;
PROBLEM: Check Calcd Positive Resid. Density on      Zn0A      2.39 eA-3
RESPONSE: ...
;
# end Validation Reply Form

```

---

**PLATON version of 20/01/2022; check.def file version of 19/01/2022**

Datablock muf-91-9h-76pc - ellipsoid plot

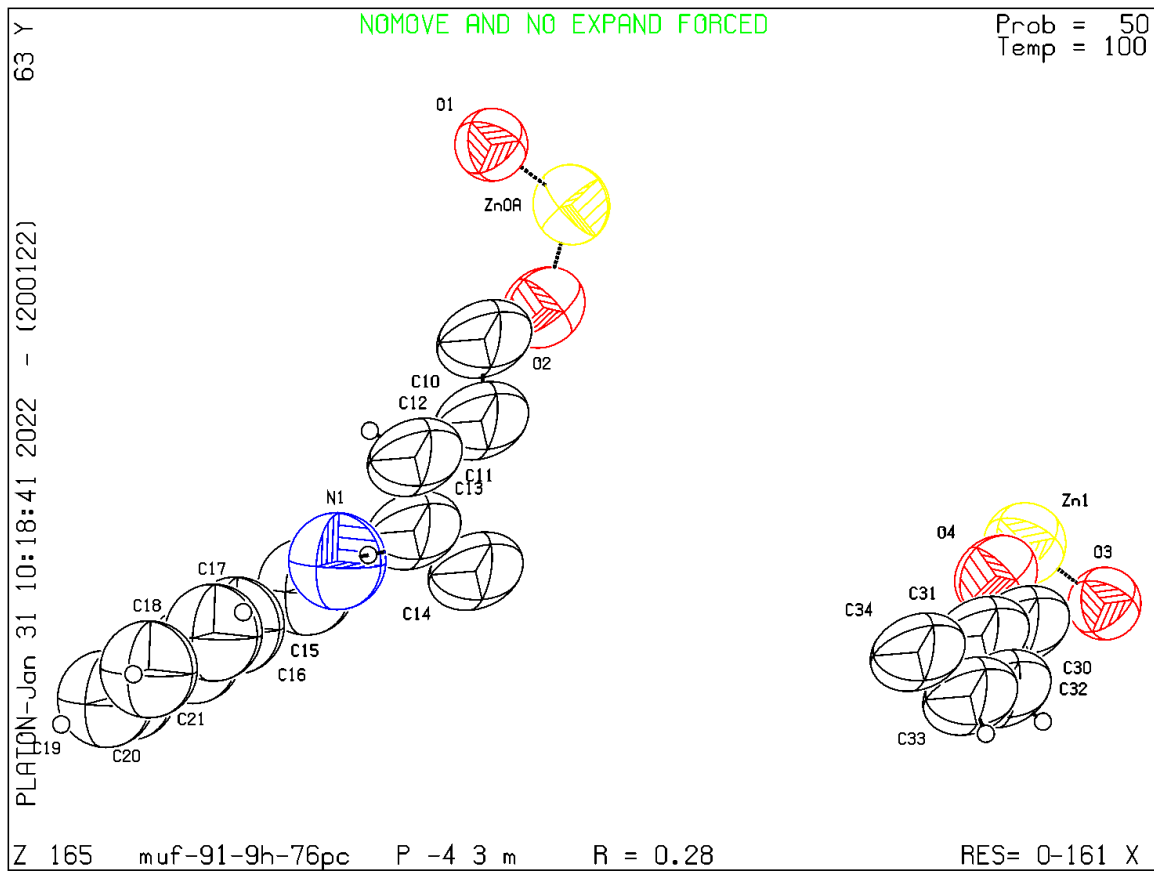

Supplement: Supplementary file 12 [file f1a52de563566eacd2800bf4.pdf]
