# Supplementary material for: Hetero-interpenetrated metal-organic frameworks
Source: Research Square preprint supplement (doi:10.21203/rs.3.rs-1342292/v1), 2022-02-17
Supplement: Supplementary file 7 [file 92f04d872ff73aa66ab7be31.pdf]

## checkCIF/PLATON report

Structure factors have been supplied for datablock(s) muf-92-3h-48pc

THIS REPORT IS FOR GUIDANCE ONLY. IF USED AS PART OF A REVIEW PROCEDURE FOR PUBLICATION, IT SHOULD NOT REPLACE THE EXPERTISE OF AN EXPERIENCED CRYSTALLOGRAPHIC REFEREE.

No syntax errors found.      CIF dictionary      Interpreting this report

### Datablock: muf-92-3h-48pc

---

Bond precision:      O- C = 0.0002 A      Wavelength=0.71075

Cell:                      a=17.132 (3)                      b=17.132 (3)                      c=17.132 (3)  
                                    alpha=90                      beta=90                      gamma=90

Temperature:              100 K

|                        | Calculated                                                         | Reported                                                        |
|------------------------|--------------------------------------------------------------------|-----------------------------------------------------------------|
| Volume                 | 5028 (3)                                                           | 5028 (3)                                                        |
| Space group            | P -4 3 m                                                           | P -4 3 m                                                        |
| Hall group             | P -4 2 3                                                           | P -4 2 3                                                        |
| Moiety formula         | C7 H4 N0.50 O1.08 Zn0.33,<br>2 (C0.84 H0.54 N0.06 O0.26<br>Zn0.08) | C84 H48 N6 O13 Zn4, C20.238<br>H13.011 N1.446 O6.264<br>Zn1.927 |
| Sum formula            | C8.68 H5.08 N0.62 O1.60<br>Zn0.49                                  | C104.24 H61.01 N7.45 O19.26<br>Zn5.93                           |
| Mr                     | 175.97                                                             | 2113.60                                                         |
| Dx, g cm <sup>-3</sup> | 0.697                                                              | 0.698                                                           |
| Z                      | 12                                                                 | 1                                                               |
| Mu (mm <sup>-1</sup> ) | 0.730                                                              | 0.731                                                           |
| F000                   | 1069.5                                                             | 1071.0                                                          |
| F000'                  | 1071.63                                                            |                                                                 |
| h, k, lmax             | 11, 11, 11                                                         | 11, 11, 11                                                      |
| Nref                   | 338 [ 200]                                                         | 333                                                             |
| Tmin, Tmax             |                                                                    | 0.649, 0.745                                                    |
| Tmin'                  |                                                                    |                                                                 |

Correction method= # Reported T Limits: Tmin=0.649 Tmax=0.745  
AbsCorr = MULTII-SCAN

Data completeness= 1.66/0.99

Theta (max)= 13.681

R(reflections)= 0.1765( 312)

wR2(reflections)=  
0.4204( 333)

S = 2.357

Npar= 66

---

The following ALERTS were generated. Each ALERT has the format

**test-name\_ALERT\_alert-type\_alert-level.**

Click on the hyperlinks for more details of the test.

---

### Alert level A

THETM01\_ALERT\_3\_A The value of sine(theta\_max)/wavelength is less than 0.550  
Calculated sin(theta\_max)/wavelength = 0.3328  
PLAT090\_ALERT\_3\_A Poor Data / Parameter Ratio (Zmax > 18) ..... 2.97 Note  
PLAT601\_ALERT\_2\_A Unit Cell Contains Solvent Accessible VOIDS of . 1537 Ang\*\*3

---

### Alert level B

PLAT049\_ALERT\_1\_B Calculated Density Less Than 1.0 gcm-3 ..... 0.6974 Check  
PLAT082\_ALERT\_2\_B High R1 Value ..... 0.18 Report  
PLAT084\_ALERT\_3\_B High wR2 Value (i.e. > 0.25) ..... 0.42 Report  
PLAT245\_ALERT\_2\_B U(iso) H7A Smaller than U(eq) N9A by 0.095 Ang\*\*2  
PLAT987\_ALERT\_1\_B The Flack x is >> 0 - Do a BASF/TWIN Refinement Please Check

---

### Alert level C

GOODF01\_ALERT\_2\_C The least squares goodness of fit parameter lies  
outside the range 0.80 <> 2.00  
Goodness of fit given = 2.357  
STRVA01\_ALERT\_4\_C Flack test results are ambiguous.  
From the CIF: \_refine\_ls\_abs\_structure\_Flack 0.690  
From the CIF: \_refine\_ls\_abs\_structure\_Flack\_su 0.030  
PLAT041\_ALERT\_1\_C Calc. and Reported SumFormula Strings Differ Please Check  
PLAT053\_ALERT\_1\_C Minimum Crystal Dimension Missing (or Error) ... Please Check  
PLAT054\_ALERT\_1\_C Medium Crystal Dimension Missing (or Error) ... Please Check  
PLAT055\_ALERT\_1\_C Maximum Crystal Dimension Missing (or Error) ... Please Check  
PLAT077\_ALERT\_4\_C Unitcell Contains Non-integer Number of Atoms .. Please Check  
PLAT087\_ALERT\_2\_C Unsatisfactory S value (Too High) ..... 2.36 Check  
PLAT241\_ALERT\_2\_C High 'MainMol' Ueq as Compared to Neighbors of C4A Check  
PLAT242\_ALERT\_2\_C Low 'MainMol' Ueq as Compared to Neighbors of O3A Check  
PLAT260\_ALERT\_2\_C Large Average Ueq of Residue Including Zn2A 0.240 Check  
PLAT260\_ALERT\_2\_C Large Average Ueq of Residue Including Zn2B 0.207 Check  
PLAT329\_ALERT\_4\_C Carbon Atom Hybridisation Unclear for ..... C7A Check  
PLAT907\_ALERT\_2\_C Flack x > 0.5, Structure Needs to be Inverted? . 0.69 Check  
PLAT918\_ALERT\_3\_C Reflection(s) with I(obs) much Smaller I(calc) . 2 Check  
PLAT927\_ALERT\_1\_C Reported and Calculated wR2 Differ by ..... 0.0030 Check  
PLAT934\_ALERT\_3\_C Number of (Iobs-Icalc)/Sigma(W) > 10 Outliers .. 1 Check  
PLAT939\_ALERT\_3\_C Large Value of Not (SHELXL) Weight Optimized S . 46.87 Check

---

### Alert level G

FORMU01\_ALERT\_2\_G There is a discrepancy between the atom counts in the  
\_chemical\_formula\_sum and the formula from the \_atom\_site\* data.  
Atom count from \_chemical\_formula\_sum: C104.24 H61.01 N7.45 O19.26 Zn5.  
Atom count from the \_atom\_site data: C95.15998 H59.27999 N6.72 O19.24

CELLZ01\_ALERT\_1\_G Difference between formula and atom\_site contents detected.

CELLZ01\_ALERT\_1\_G ALERT: Large difference may be due to a

symmetry error - see SYMMG tests

From the CIF: \_cell\_formula\_units\_Z 1

From the CIF: \_chemical\_formula\_sum C104.24 H61.01 N7.45 O19.26 Zn5.93

TEST: Compare cell contents of formula and atom\_site data

| atom | Z*formula | cif sites | diff |
|------|-----------|-----------|------|
| C    | 104.24    | 95.16     | 9.08 |
| H    | 61.01     | 59.28     | 1.73 |
| N    | 7.45      | 6.72      | 0.73 |
| O    | 19.26     | 19.24     | 0.02 |
| Zn   | 5.93      | 2.59      | 3.34 |

|                   |                                                  |         |              |
|-------------------|--------------------------------------------------|---------|--------------|
| PLAT002_ALERT_2_G | Number of Distance or Angle Restraints on AtSite | 14      | Note         |
| PLAT003_ALERT_2_G | Number of Uiso or Uij Restrained non-H Atoms ... | 25      | Report       |
| PLAT004_ALERT_5_G | Polymeric Structure Found with Maximum Dimension | 3       | Info         |
| PLAT007_ALERT_5_G | Number of Unrefined Donor-H Atoms .....          | 4       | Report       |
| PLAT042_ALERT_1_G | Calc. and Reported Moiety Formula Strings Differ |         | Please Check |
| PLAT045_ALERT_1_G | Calculated and Reported Z Differ by a Factor ... | 12.0000 | Check        |
| PLAT068_ALERT_1_G | Reported F000 Differs from Calcd (or Missing)... |         | Please Check |
| PLAT072_ALERT_2_G | SHELXL First Parameter in WGHT Unusually Large   | 0.20    | Report       |
| PLAT171_ALERT_4_G | The CIF-Embedded .res File Contains EADP Records | 2       | Report       |
| PLAT172_ALERT_4_G | The CIF-Embedded .res File Contains DFIX Records | 12      | Report       |
| PLAT174_ALERT_4_G | The CIF-Embedded .res File Contains FLAT Records | 3       | Report       |
| PLAT176_ALERT_4_G | The CIF-Embedded .res File Contains SADI Records | 1       | Report       |
| PLAT178_ALERT_4_G | The CIF-Embedded .res File Contains SIMU Records | 5       | Report       |
| PLAT186_ALERT_4_G | The CIF-Embedded .res File Contains ISOR Records | 2       | Report       |
| PLAT300_ALERT_4_G | Atom Site Occupancy of Zn2A Constrained at       | 0.1667  | Check        |
| PLAT300_ALERT_4_G | Atom Site Occupancy of C6A Constrained at        | 0.5     | Check        |
| PLAT300_ALERT_4_G | Atom Site Occupancy of C7A Constrained at        | 0.5     | Check        |
| PLAT300_ALERT_4_G | Atom Site Occupancy of N9A Constrained at        | 0.25    | Check        |
| PLAT300_ALERT_4_G | Atom Site Occupancy of C5A Constrained at        | 0.25    | Check        |
| PLAT300_ALERT_4_G | Atom Site Occupancy of C8A Constrained at        | 0.25    | Check        |
| PLAT300_ALERT_4_G | Atom Site Occupancy of C11A Constrained at       | 0.25    | Check        |
| PLAT300_ALERT_4_G | Atom Site Occupancy of C12A Constrained at       | 0.25    | Check        |
| PLAT300_ALERT_4_G | Atom Site Occupancy of C13A Constrained at       | 0.25    | Check        |
| PLAT300_ALERT_4_G | Atom Site Occupancy of C14A Constrained at       | 0.25    | Check        |
| PLAT300_ALERT_4_G | Atom Site Occupancy of C15A Constrained at       | 0.25    | Check        |
| PLAT300_ALERT_4_G | Atom Site Occupancy of C16A Constrained at       | 0.25    | Check        |
| PLAT300_ALERT_4_G | Atom Site Occupancy of C17A Constrained at       | 0.25    | Check        |
| PLAT300_ALERT_4_G | Atom Site Occupancy of H6A Constrained at        | 0.5     | Check        |
| PLAT300_ALERT_4_G | Atom Site Occupancy of H7A Constrained at        | 0.25    | Check        |
| PLAT300_ALERT_4_G | Atom Site Occupancy of H13A Constrained at       | 0.25    | Check        |
| PLAT300_ALERT_4_G | Atom Site Occupancy of H14A Constrained at       | 0.25    | Check        |
| PLAT300_ALERT_4_G | Atom Site Occupancy of H15A Constrained at       | 0.25    | Check        |
| PLAT300_ALERT_4_G | Atom Site Occupancy of H16A Constrained at       | 0.25    | Check        |
| PLAT300_ALERT_4_G | Atom Site Occupancy of H17A Constrained at       | 0.25    | Check        |
| PLAT301_ALERT_3_G | Main Residue Disorder .....(Resd 1 )             | 81%     | Note         |
| PLAT302_ALERT_4_G | Anion/Solvent/Minor-Residue Disorder (Resd 2 )   | 100%    | Note         |
| PLAT315_ALERT_2_G | Singly Bonded Carbon Detected (H-atoms Missing). | C8A     | Check        |
| PLAT720_ALERT_4_G | Number of Unusual/Non-Standard Labels .....      | 3       | Note         |
| PLAT779_ALERT_4_G | Suspect or Irrelevant (Bond) Angle(s) in CIF ... | 6.70    | Deg.         |
|                   | N9A -C7A -H7A 1_555 1_555 1_555 .....            | # 15    | Check        |
| PLAT779_ALERT_4_G | Suspect or Irrelevant (Bond) Angle(s) in CIF ... | 10.90   | Deg.         |
|                   | C7A -N9A -H7A 1_555 1_555 1_555 .....            | # 16    | Check        |
| PLAT789_ALERT_4_G | Atoms with Negative _atom_site_disorder_group #  | 24      | Check        |
| PLAT811_ALERT_5_G | No ADDSYM Analysis: Too Many Excluded Atoms .... |         | ! Info       |

|                   |                                                  |     |             |
|-------------------|--------------------------------------------------|-----|-------------|
| PLAT860_ALERT_3_G | Number of Least-Squares Restraints .....         | 120 | Note        |
| PLAT883_ALERT_1_G | No Info/Value for _atom_sites_solution_primary . |     | Please Do ! |
| PLAT909_ALERT_3_G | Percentage of I>2sig(I) Data at Theta(Max) Still | 79% | Note        |
| PLAT910_ALERT_3_G | Missing # of FCF Reflection(s) Below Theta(Min). | 4   | Note        |
| PLAT913_ALERT_3_G | Missing # of Very Strong Reflections in FCF .... | 2   | Note        |

---

3 **ALERT level A** = Most likely a serious problem - resolve or explain  
 5 **ALERT level B** = A potentially serious problem, consider carefully  
 18 **ALERT level C** = Check. Ensure it is not caused by an omission or oversight  
 50 **ALERT level G** = General information/check it is not something unexpected

13 ALERT type 1 CIF construction/syntax error, inconsistent or missing data  
 15 ALERT type 2 Indicator that the structure model may be wrong or deficient  
 11 ALERT type 3 Indicator that the structure quality may be low  
 34 ALERT type 4 Improvement, methodology, query or suggestion  
 3 ALERT type 5 Informative message, check

---

It is advisable to attempt to resolve as many as possible of the alerts in all categories. Often the minor alerts point to easily fixed oversights, errors and omissions in your CIF or refinement strategy, so attention to these fine details can be worthwhile. In order to resolve some of the more serious problems it may be necessary to carry out additional measurements or structure refinements. However, the purpose of your study may justify the reported deviations and the more serious of these should normally be commented upon in the discussion or experimental section of a paper or in the "special\_details" fields of the CIF. checkCIF was carefully designed to identify outliers and unusual parameters, but every test has its limitations and alerts that are not important in a particular case may appear. Conversely, the absence of alerts does not guarantee there are no aspects of the results needing attention. It is up to the individual to critically assess their own results and, if necessary, seek expert advice.

### Publication of your CIF in IUCr journals

A basic structural check has been run on your CIF. These basic checks will be run on all CIFs submitted for publication in IUCr journals (*Acta Crystallographica*, *Journal of Applied Crystallography*, *Journal of Synchrotron Radiation*); however, if you intend to submit to *Acta Crystallographica Section C* or *E* or *IUCrData*, you should make sure that full publication checks are run on the final version of your CIF prior to submission.

### Publication of your CIF in other journals

Please refer to the *Notes for Authors* of the relevant journal for any special instructions relating to CIF submission.

### Validation response form

Please find below a validation response form (VRF) that can be filled in and pasted into your CIF.
