# Supplementary material for: Hetero-interpenetrated metal-organic frameworks
Source: Research Square preprint supplement (doi:10.21203/rs.3.rs-1342292/v1), 2022-02-17
Supplement: Supplementary file 8 [file 9840d1fb8bdaaf303763fae6.pdf]

## checkCIF/PLATON report

Structure factors have been supplied for datablock(s) muf-91-15h-68pc

THIS REPORT IS FOR GUIDANCE ONLY. IF USED AS PART OF A REVIEW PROCEDURE FOR PUBLICATION, IT SHOULD NOT REPLACE THE EXPERTISE OF AN EXPERIENCED CRYSTALLOGRAPHIC REFEREE.

No syntax errors found.      CIF dictionary      Interpreting this report

### Datablock: muf-91-15h-68pc

---

|                        |                                   |                                                    |
|------------------------|-----------------------------------|----------------------------------------------------|
| Bond precision:        | = 0.0000 A                        | Wavelength=0.95372                                 |
| Cell:                  | a=17.076(11)                      | b=17.076(11)      c=17.076(11)                     |
|                        | alpha=90                          | beta=90      gamma=90                              |
| Temperature:           | 100 K                             |                                                    |
|                        | Calculated                        | Reported                                           |
| Volume                 | 4979(10)                          | 4979(10)                                           |
| Space group            | P -4 3 m                          | P -4 3 m                                           |
| Hall group             | P -4 2 3                          | P -4 2 3                                           |
| Moiety formula         | 2(C9.37 H5.35 N0.50 O1.82 Zn0.56) | C84 H48 N6 O13 Zn4, C28.369 H16.211 O8.781 Zn2.702 |
| Sum formula            | C18.73 H10.70 N 03.63 Zn1.12      | C112.37 H64.21 N6 O21.78 Zn6.70                    |
| Mr                     | 381.03                            | 2284.80                                            |
| Dx, g cm <sup>-3</sup> | 0.762                             | 0.762                                              |
| Z                      | 6                                 | 1                                                  |
| Mu (mm <sup>-1</sup> ) | 1.826                             | 1.799                                              |
| F000                   | 1156.3                            | 1156.0                                             |
| F000'                  | 1156.39                           |                                                    |
| h, k, lmax             | 17, 17, 17                        | 17, 17, 16                                         |
| Nref                   | 1033[ 581]                        | 1031                                               |
| Tmin, Tmax             |                                   | 0.524, 0.746                                       |
| Tmin'                  |                                   |                                                    |

Correction method= # Reported T Limits: Tmin=0.524 Tmax=0.746

AbsCorr = MULTI-SCAN

Data completeness= 1.77/1.00

Theta(max)= 28.449

R(reflections)= 0.1803( 815)

wR2(reflections)=  
0.5023( 1031)

S = 2.316

Npar= 33

---

The following ALERTS were generated. Each ALERT has the format

**test-name\_ALERT\_alert-type\_alert-level.**

Click on the hyperlinks for more details of the test.

---

### Alert level A

THETM01\_ALERT\_3\_A The value of sine(theta\_max)/wavelength is less than 0.550

Calculated sin(theta\_max)/wavelength = 0.4995

PLAT084\_ALERT\_3\_A High wR2 Value (i.e. > 0.25) ..... 0.50 Report

PLAT601\_ALERT\_2\_A Unit Cell Contains Solvent Accessible VOIDS of . 1597 Ang\*\*3

---

### Alert level B

PLAT049\_ALERT\_1\_B Calculated Density Less Than 1.0 gcm-3 ..... 0.7625 Check

PLAT082\_ALERT\_2\_B High R1 Value ..... 0.18 Report

PLAT971\_ALERT\_2\_B Check Calcd Resid. Dens. 1.92Ang From O1 2.74 eA-3

PLAT973\_ALERT\_2\_B Check Calcd Positive Resid. Density on Zn0A 1.60 eA-3

---

### Alert level C

GOODF01\_ALERT\_2\_C The least squares goodness of fit parameter lies  
outside the range 0.80 <> 2.00

Goodness of fit given = 2.316

STRVA01\_ALERT\_4\_C Flack test results are ambiguous.

From the CIF: \_refine\_ls\_abs\_structure\_Flack 0.553

From the CIF: \_refine\_ls\_abs\_structure\_Flack\_su 0.014

PLAT041\_ALERT\_1\_C Calc. and Reported SumFormula Strings Differ Please Check

PLAT053\_ALERT\_1\_C Minimum Crystal Dimension Missing (or Error) ... Please Check

PLAT054\_ALERT\_1\_C Medium Crystal Dimension Missing (or Error) ... Please Check

PLAT055\_ALERT\_1\_C Maximum Crystal Dimension Missing (or Error) ... Please Check

PLAT077\_ALERT\_4\_C Unitcell Contains Non-integer Number of Atoms .. Please Check

PLAT087\_ALERT\_2\_C Unsatisfactory S value (Too High) ..... 2.32 Check

PLAT094\_ALERT\_2\_C Ratio of Maximum / Minimum Residual Density .... 3.34 Report

PLAT260\_ALERT\_2\_C Large Average Ueq of Residue Including Zn1 0.150 Check

PLAT907\_ALERT\_2\_C Flack x > 0.5, Structure Needs to be Inverted? . 0.55 Check

PLAT911\_ALERT\_3\_C Missing FCF Refl Between Thmin & STh/L= 0.499 3 Report

PLAT918\_ALERT\_3\_C Reflection(s) with I(obs) much Smaller I(calc) . 4 Check

PLAT939\_ALERT\_3\_C Large Value of Not (SHELXL) Weight Optimized S . 13.54 Check

---

### Alert level G

FORMU01\_ALERT\_2\_G There is a discrepancy between the atom counts in the

\_chemical\_formula\_sum and the formula from the \_atom\_site\* data.

Atom count from \_chemical\_formula\_sum: C112.37 H64.21 N6 O21.78 Zn6.7

Atom count from the \_atom\_site data: C81.65399 H56.11199 N6 O10.12580

ABSMU01\_ALERT\_1\_G Calculation of \_exptl\_absorpt\_correction\_mu

not performed for this radiation type.

CELLZ01\_ALERT\_1\_G Difference between formula and atom\_site contents detected.

CELLZ01\_ALERT\_1\_G ALERT: Large difference may be due to a

symmetry error - see SYMMG tests

From the CIF: \_cell\_formula\_units\_Z 1  
 From the CIF: \_chemical\_formula\_sum C112.37 H64.21 N6 O21.78 Zn6.70  
 TEST: Compare cell contents of formula and atom\_site data

| atom | Z*formula | cif sites | diff  |
|------|-----------|-----------|-------|
| C    | 112.37    | 81.65     | 30.72 |
| H    | 64.21     | 56.11     | 8.10  |
| N    | 6.00      | 6.00      | 0.00  |
| O    | 21.78     | 10.13     | 11.65 |
| Zn   | 6.70      | 1.12      | 5.58  |

|                   |                                                  |         |              |
|-------------------|--------------------------------------------------|---------|--------------|
| PLAT002_ALERT_2_G | Number of Distance or Angle Restraints on AtSite | 10      | Note         |
| PLAT003_ALERT_2_G | Number of Uiso or Uij Restrained non-H Atoms ... | 19      | Report       |
| PLAT042_ALERT_1_G | Calc. and Reported Moiety Formula Strings Differ |         | Please Check |
| PLAT045_ALERT_1_G | Calculated and Reported Z Differ by a Factor ... | 6.0000  | Check        |
| PLAT068_ALERT_1_G | Reported F000 Differs from Calcd (or Missing)... |         | Please Check |
| PLAT072_ALERT_2_G | SHELXL First Parameter in WGHT Unusually Large   | 0.20    | Report       |
| PLAT092_ALERT_4_G | Check: Wavelength Given is not Cu,Ga,Mo,Ag,In Ka | 0.95372 | Ang.         |
| PLAT171_ALERT_4_G | The CIF-Embedded .res File Contains EADP Records | 3       | Report       |
| PLAT172_ALERT_4_G | The CIF-Embedded .res File Contains DFIX Records | 11      | Report       |
| PLAT174_ALERT_4_G | The CIF-Embedded .res File Contains FLAT Records | 3       | Report       |
| PLAT178_ALERT_4_G | The CIF-Embedded .res File Contains SIMU Records | 3       | Report       |
| PLAT186_ALERT_4_G | The CIF-Embedded .res File Contains ISOR Records | 2       | Report       |
| PLAT300_ALERT_4_G | Atom Site Occupancy of Zn0A                      | 0.1667  | Check        |
| PLAT300_ALERT_4_G | Atom Site Occupancy of O2                        | 0.5     | Check        |
| PLAT300_ALERT_4_G | Atom Site Occupancy of O1                        | 0.0417  | Check        |
| PLAT300_ALERT_4_G | Atom Site Occupancy of C12                       | 0.5     | Check        |
| PLAT300_ALERT_4_G | Atom Site Occupancy of C13                       | 0.5     | Check        |
| PLAT300_ALERT_4_G | Atom Site Occupancy of N1                        | 0.25    | Check        |
| PLAT300_ALERT_4_G | Atom Site Occupancy of C10                       | 0.25    | Check        |
| PLAT300_ALERT_4_G | Atom Site Occupancy of C11                       | 0.25    | Check        |
| PLAT300_ALERT_4_G | Atom Site Occupancy of C14                       | 0.25    | Check        |
| PLAT300_ALERT_4_G | Atom Site Occupancy of C15                       | 0.25    | Check        |
| PLAT300_ALERT_4_G | Atom Site Occupancy of C16                       | 0.25    | Check        |
| PLAT300_ALERT_4_G | Atom Site Occupancy of C17                       | 0.25    | Check        |
| PLAT300_ALERT_4_G | Atom Site Occupancy of C18                       | 0.25    | Check        |
| PLAT300_ALERT_4_G | Atom Site Occupancy of C19                       | 0.25    | Check        |
| PLAT300_ALERT_4_G | Atom Site Occupancy of C20                       | 0.25    | Check        |
| PLAT300_ALERT_4_G | Atom Site Occupancy of C21                       | 0.25    | Check        |
| PLAT300_ALERT_4_G | Atom Site Occupancy of H12                       | 0.5     | Check        |
| PLAT300_ALERT_4_G | Atom Site Occupancy of H13                       | 0.25    | Check        |
| PLAT300_ALERT_4_G | Atom Site Occupancy of H17                       | 0.25    | Check        |
| PLAT300_ALERT_4_G | Atom Site Occupancy of H18                       | 0.25    | Check        |
| PLAT300_ALERT_4_G | Atom Site Occupancy of H19                       | 0.25    | Check        |
| PLAT300_ALERT_4_G | Atom Site Occupancy of H20                       | 0.25    | Check        |
| PLAT300_ALERT_4_G | Atom Site Occupancy of H21                       | 0.25    | Check        |
| PLAT301_ALERT_3_G | Main Residue Disorder .....(Resd 1 )             | 100%    | Note         |
| PLAT304_ALERT_4_G | Non-Integer Number of Atoms in ..... (Resd 1 )   | 17.59   | Check        |
| PLAT315_ALERT_2_G | Singly Bonded Carbon Detected (H-atoms Missing). | C14     | Check        |
| PLAT315_ALERT_2_G | Singly Bonded Carbon Detected (H-atoms Missing). | C34     | Check        |
| PLAT432_ALERT_2_G | Short Inter X...Y Contact C13 ..C15              | 2.74    | Ang.         |
|                   | z,y,x =                                          | 24_555  | Check        |
| PLAT432_ALERT_2_G | Short Inter X...Y Contact N1 ..C15               | 2.39    | Ang.         |
|                   | z,y,x =                                          | 24_555  | Check        |
| PLAT432_ALERT_2_G | Short Inter X...Y Contact C14 ..C15              | 3.17    | Ang.         |
|                   | 1-x,y,1-z =                                      | 9_656   | Check        |
| PLAT432_ALERT_2_G | Short Inter X...Y Contact C14 ..C15              | 3.17    | Ang.         |
|                   | z,y,x =                                          | 24_555  | Check        |

PLAT432\_ALERT\_2\_G Short Inter X...Y Contact C14 ..C15 . 3.17 Ang.  
1-z,y,1-x = 23\_656 Check  
PLAT720\_ALERT\_4\_G Number of Unusual/Non-Standard Labels ..... 1 Note  
PLAT789\_ALERT\_4\_G Atoms with Negative \_atom\_site\_disorder\_group # 32 Check  
PLAT860\_ALERT\_3\_G Number of Least-Squares Restraints ..... 93 Note  
PLAT883\_ALERT\_1\_G No Info/Value for \_atom\_sites\_solution\_primary . Please Do !  
PLAT909\_ALERT\_3\_G Percentage of I>2sig(I) Data at Theta(Max) Still 34% Note  
PLAT910\_ALERT\_3\_G Missing # of FCF Reflection(s) Below Theta(Min). 4 Note  
PLAT913\_ALERT\_3\_G Missing # of Very Strong Reflections in FCF .... 2 Note  
PLAT933\_ALERT\_2\_G Number of HKL-OMIT Records in Embedded .res File 3 Note  
PLAT955\_ALERT\_1\_G Reported (CIF) and Actual (FCF) Lmax Differ by . 1 Units  
PLAT984\_ALERT\_1\_G The O-f'= 0.0218 Deviates from the B&C-Value 0.0205 Check  
PLAT984\_ALERT\_1\_G The Zn-f'= -0.1382 Deviates from the B&C-Value -0.1517 Check  
PLAT985\_ALERT\_1\_G The Zn-f"= 2.4327 Deviates from the B&C-Value 2.3734 Check

---

3 **ALERT level A** = Most likely a serious problem - resolve or explain  
4 **ALERT level B** = A potentially serious problem, consider carefully  
14 **ALERT level C** = Check. Ensure it is not caused by an omission or oversight  
60 **ALERT level G** = General information/check it is not something unexpected

16 ALERT type 1 CIF construction/syntax error, inconsistent or missing data  
21 ALERT type 2 Indicator that the structure model may be wrong or deficient  
10 ALERT type 3 Indicator that the structure quality may be low  
34 ALERT type 4 Improvement, methodology, query or suggestion  
0 ALERT type 5 Informative message, check

---

It is advisable to attempt to resolve as many as possible of the alerts in all categories. Often the minor alerts point to easily fixed oversights, errors and omissions in your CIF or refinement strategy, so attention to these fine details can be worthwhile. In order to resolve some of the more serious problems it may be necessary to carry out additional measurements or structure refinements. However, the purpose of your study may justify the reported deviations and the more serious of these should normally be commented upon in the discussion or experimental section of a paper or in the "special\_details" fields of the CIF. checkCIF was carefully designed to identify outliers and unusual parameters, but every test has its limitations and alerts that are not important in a particular case may appear. Conversely, the absence of alerts does not guarantee there are no aspects of the results needing attention. It is up to the individual to critically assess their own results and, if necessary, seek expert advice.

### Publication of your CIF in IUCr journals

A basic structural check has been run on your CIF. These basic checks will be run on all CIFs submitted for publication in IUCr journals (*Acta Crystallographica*, *Journal of Applied Crystallography*, *Journal of Synchrotron Radiation*); however, if you intend to submit to *Acta Crystallographica Section C* or *E* or *IUCrData*, you should make sure that full publication checks are run on the final version of your CIF prior to submission.

### Publication of your CIF in other journals

Please refer to the *Notes for Authors* of the relevant journal for any special instructions relating to CIF submission.

### Validation response form

Please find below a validation response form (VRF) that can be filled in and pasted into your CIF.

```
# start Validation Reply Form
_vrf_THETM01_muf-91-15h-68pc
;
PROBLEM: The value of sine(theta_max)/wavelength is less than 0.550
RESPONSE: ...
;
_vrf_PLAT084_muf-91-15h-68pc
;
PROBLEM: High wR2 Value (i.e. > 0.25) ..... 0.50 Report
RESPONSE: ...
;
_vrf_PLAT601_muf-91-15h-68pc
;
PROBLEM: Unit Cell Contains Solvent Accessible VOIDS of . 1597 Ang**3
RESPONSE: ...
;
# end Validation Reply Form
```

---

**PLATON version of 20/01/2022; check.def file version of 19/01/2022**

63 Y

PLATON-Jan 31 10:33:38 2022 - (200122)

Z 165

muf-91-15h-68pc

P -4 3 m

$$R = 0.18$$

RES= 0-161 X

NOMOVE AND NO EXPAND FORCED

|            |
|------------|
| Prob = 50  |
| Temp = 100 |
